# Supplementary material for: Serum Albumin-Creatinine Ratio Predicts Sarcopenia and Poor Outcomes in Patients with Colorectal Cancer
Source: Research Square preprint supplement (doi:10.21203/rs.3.rs-7897966/v1), 2025-12-30
Supplement: Supplementary file 1 [file 2fce400b2c85294465d2fec7.docx]

**Figure S1.** The optimal threshold cutoff of ACR by ROC curve.

**
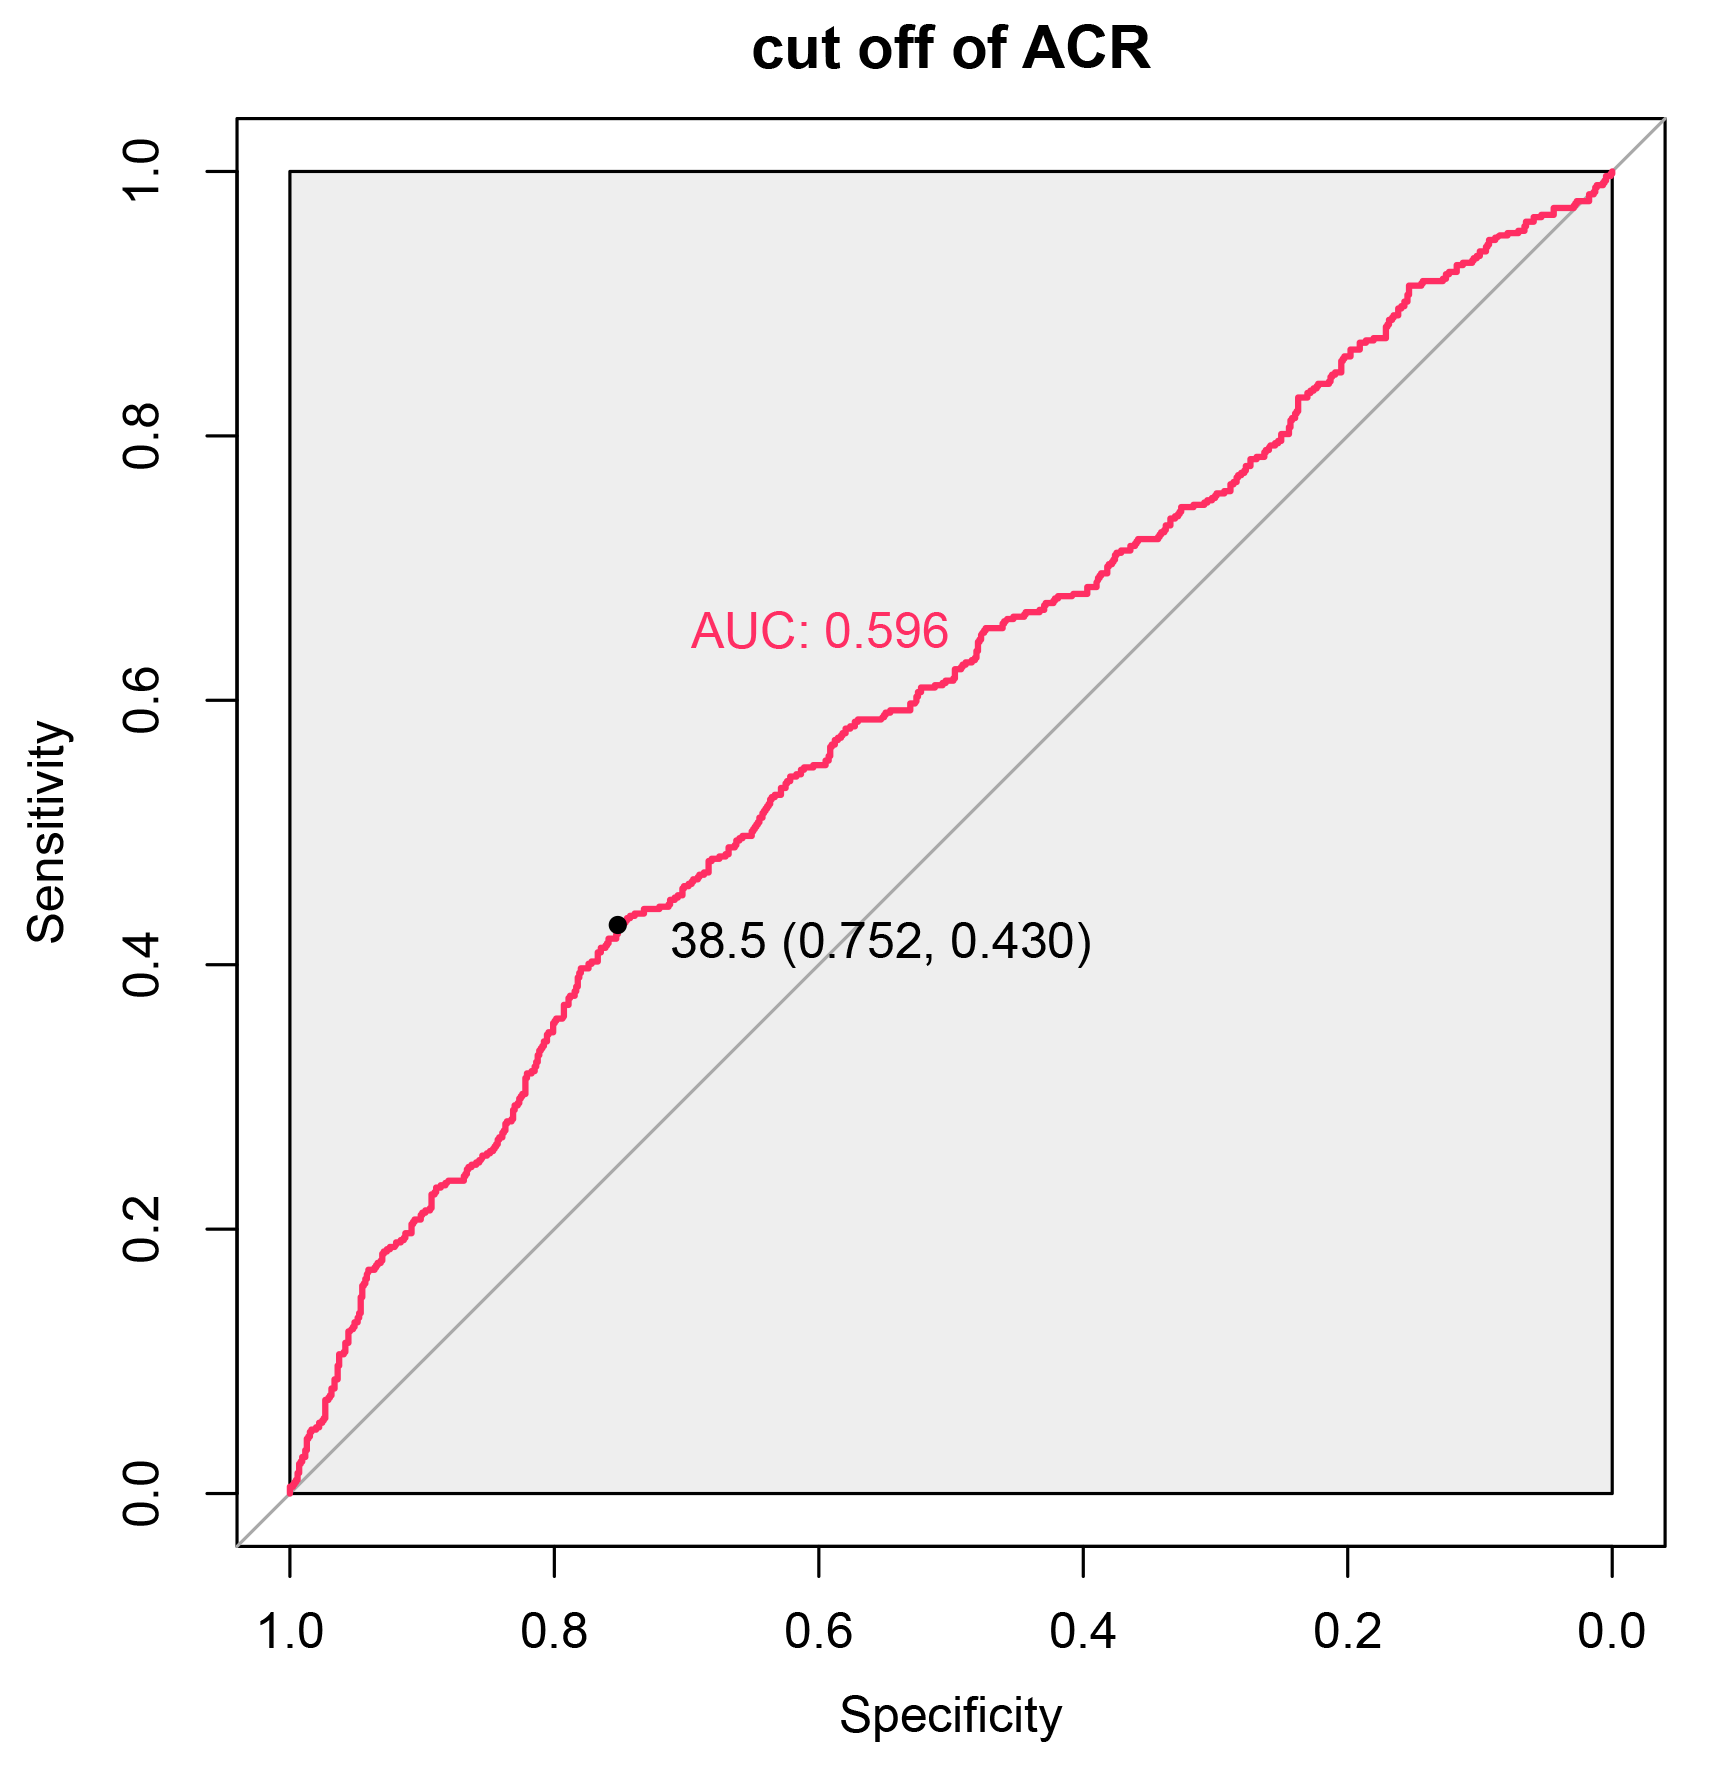
**

**Figure S2.** Comparison of the prognostic value of composite immune inflammatory markers by ROC curve.

**
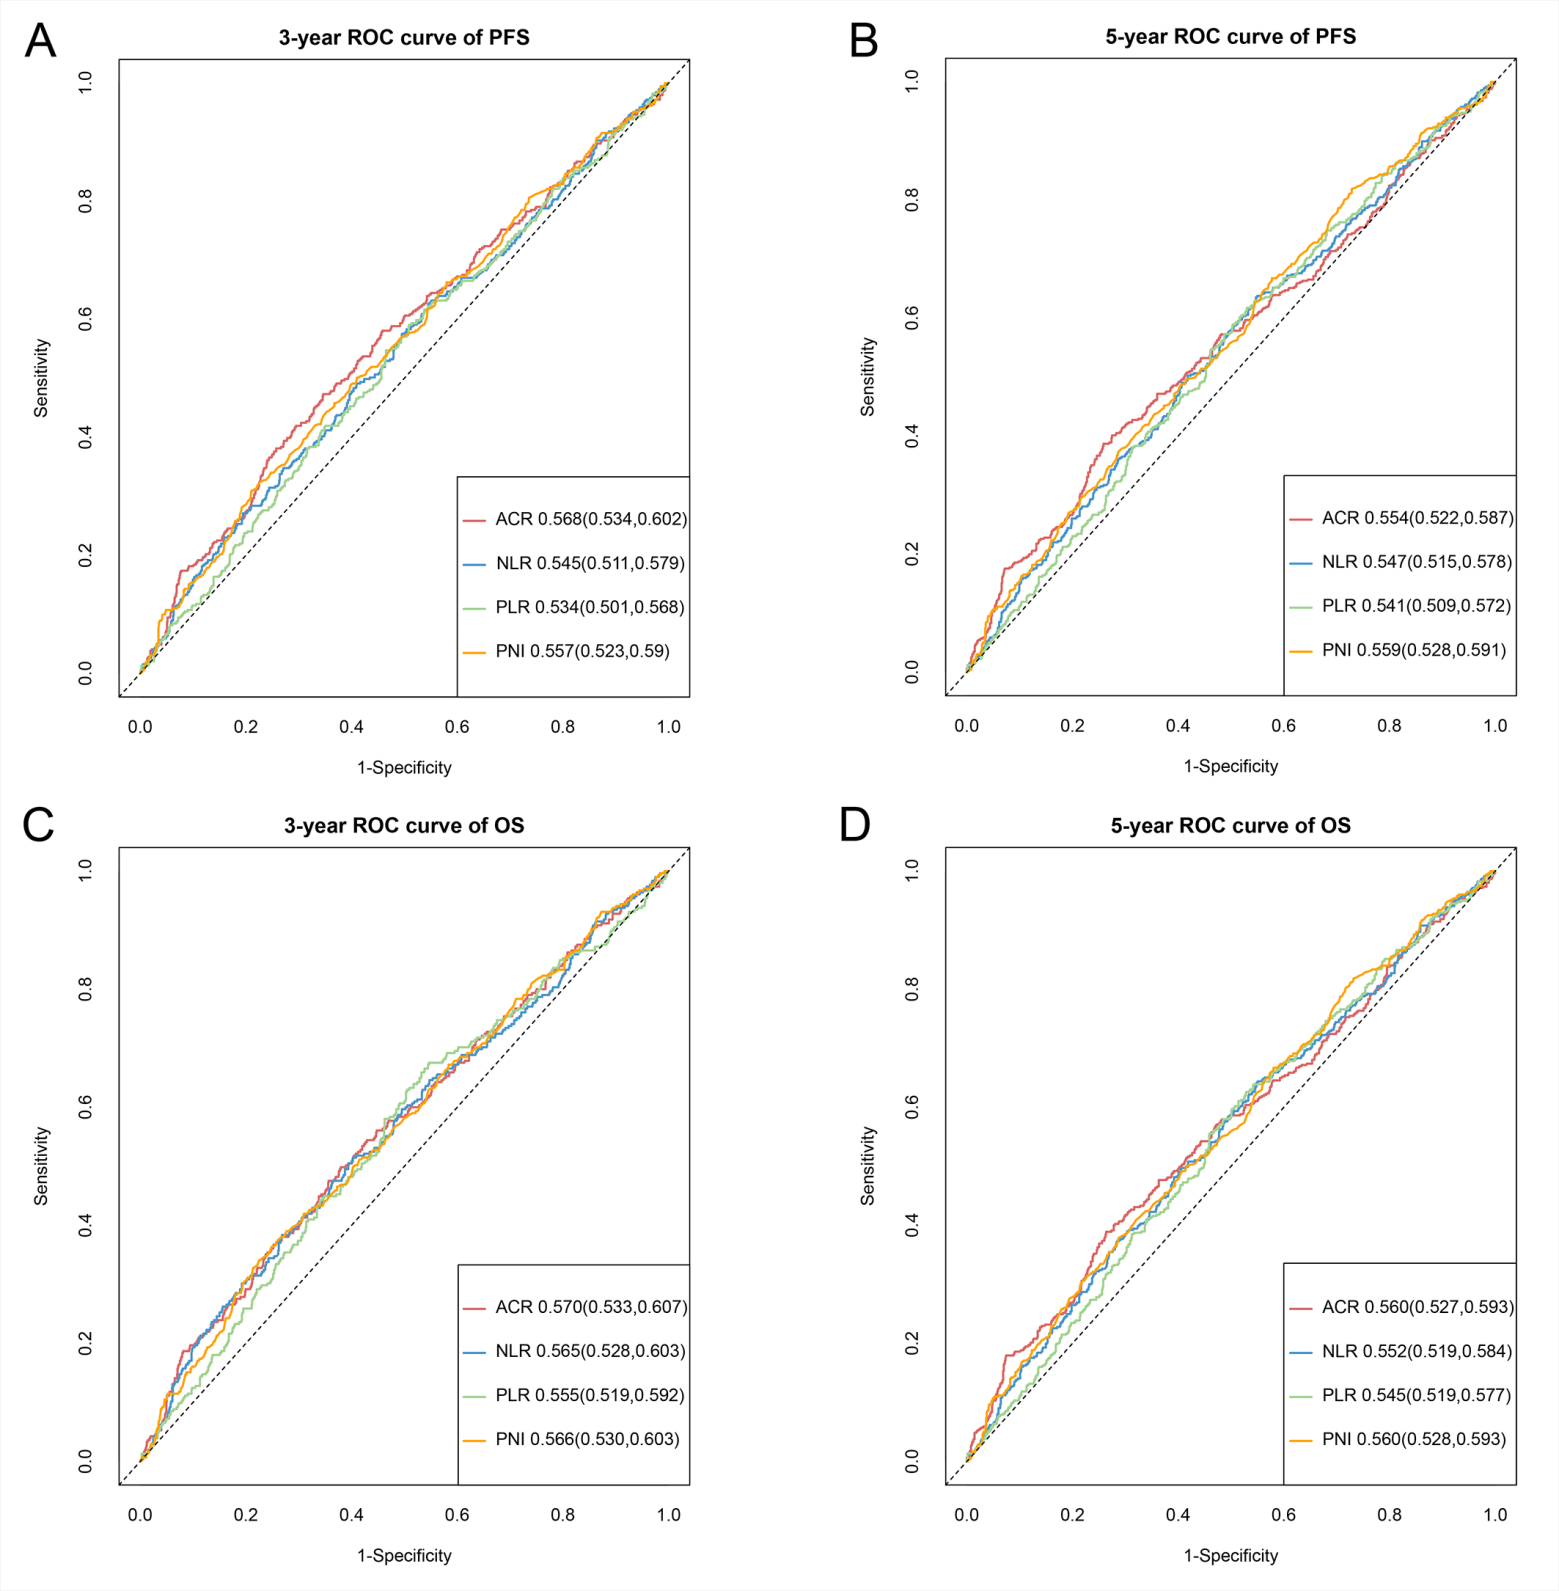
**

**Notes:** A, 3-year of PFS; B, 5-year of PFS; C, 3-year of OS; C, 5-year of OS.

**Figure S3.** Stratified Kaplan-Meier curve of ACR of patients with colon cancer.


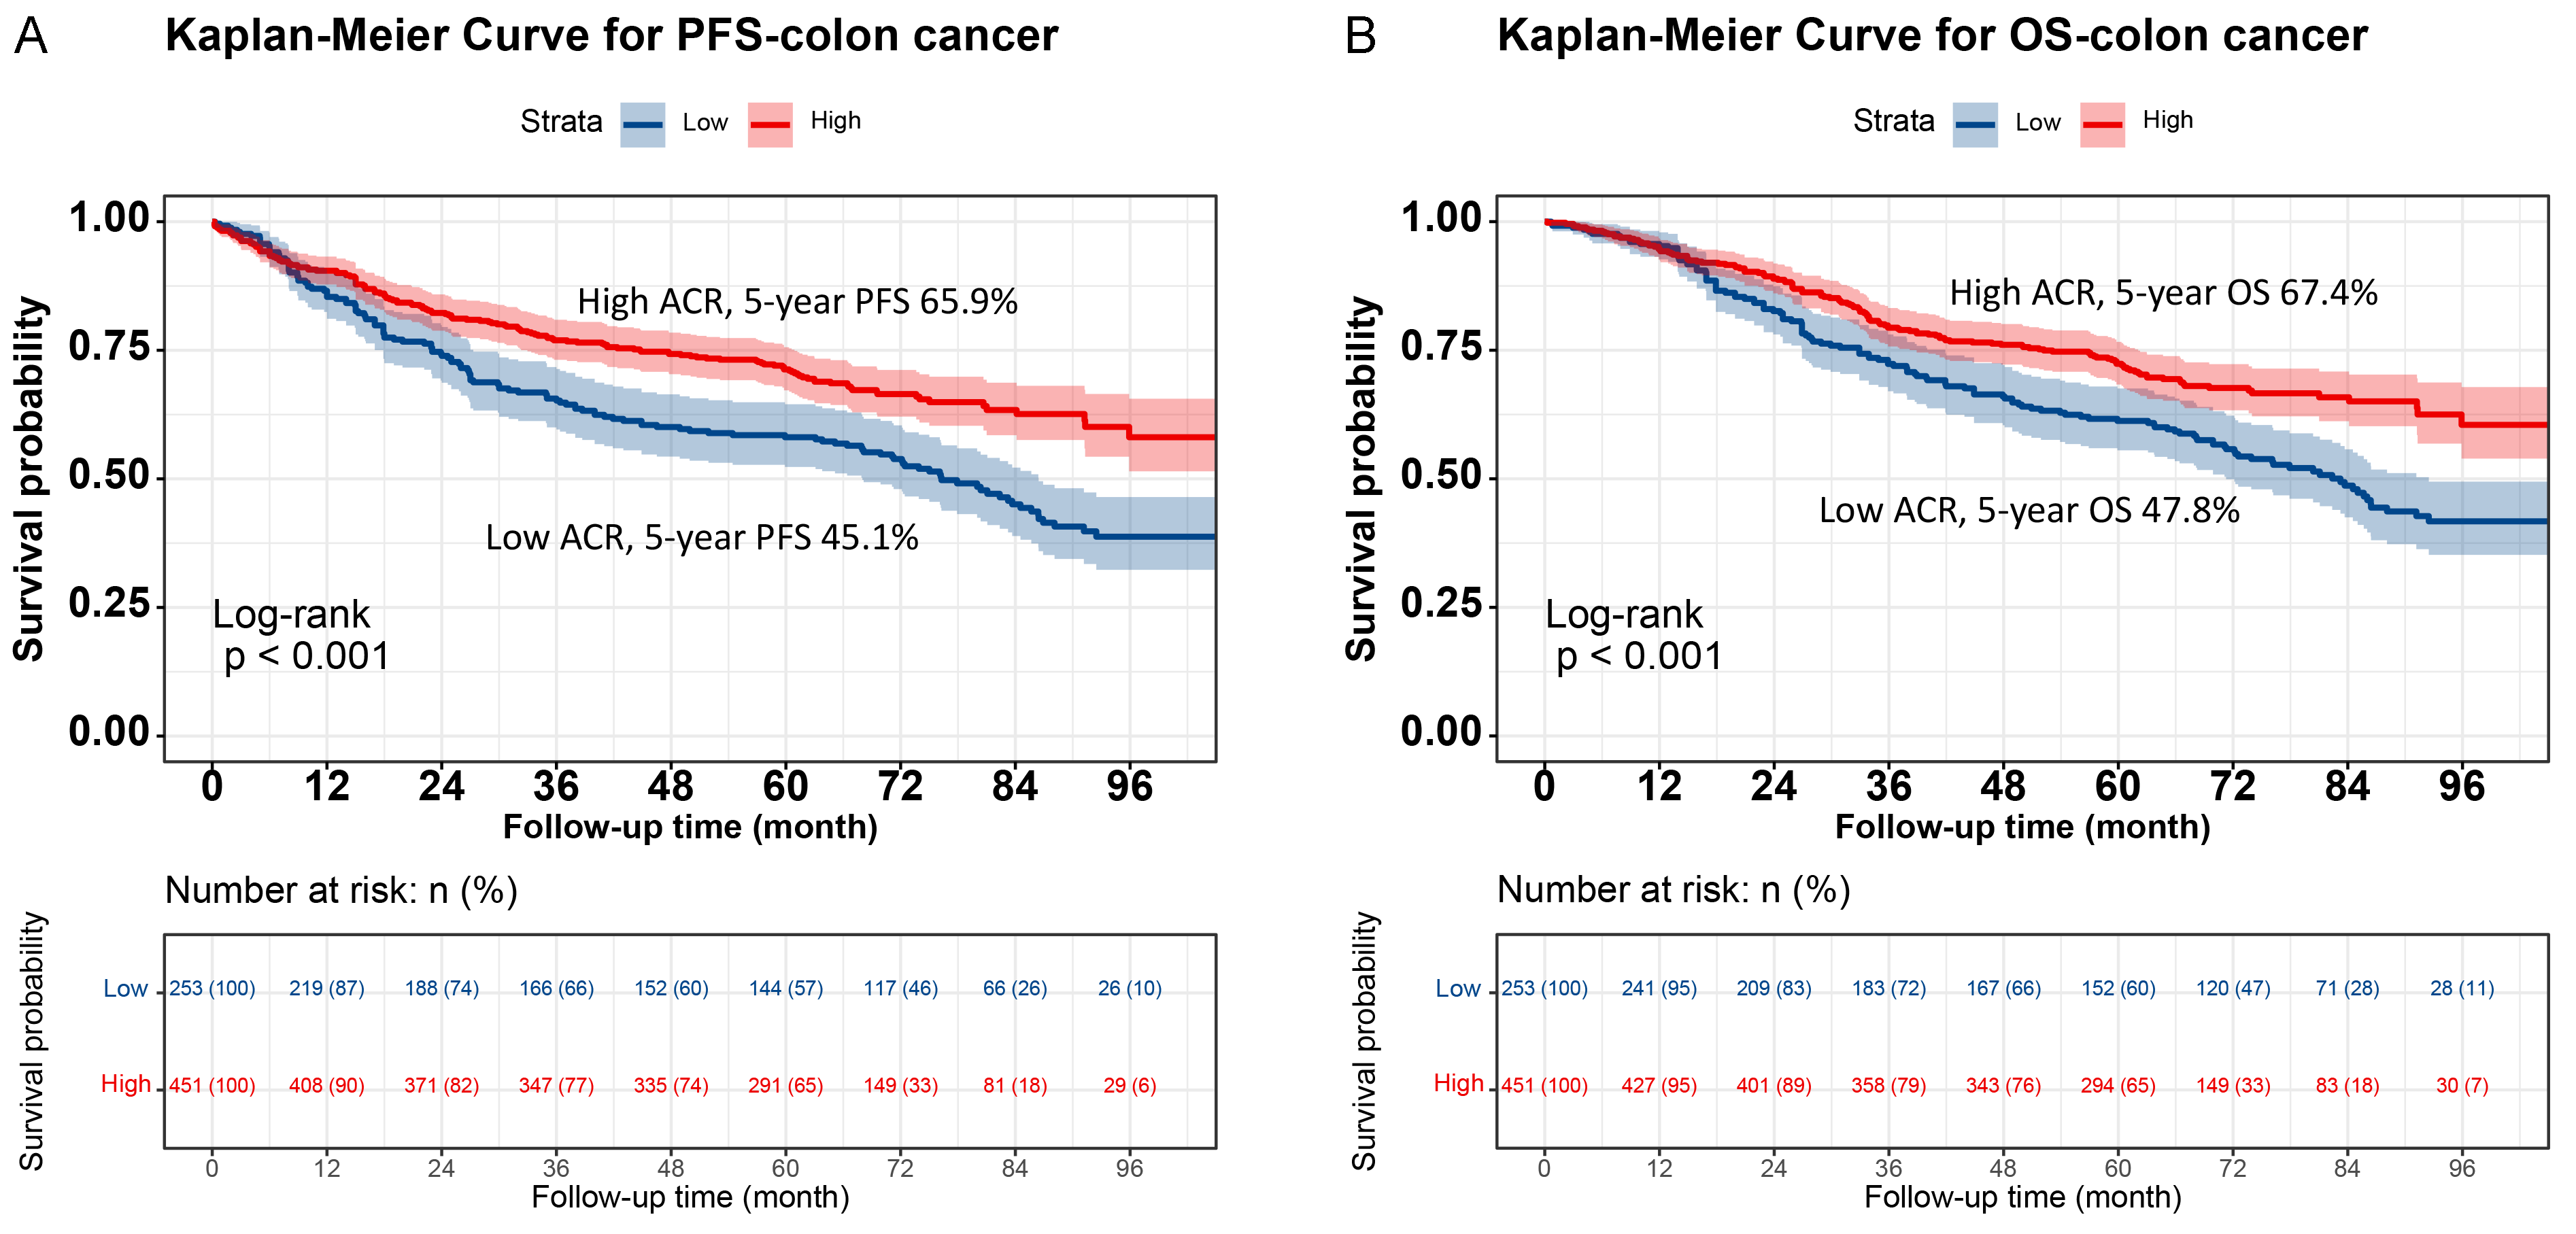


**Notes:** A, PFS; B, OS.

**Figure S4.** Stratified Kaplan-Meier curve of ACR of patients with rectal cancer.


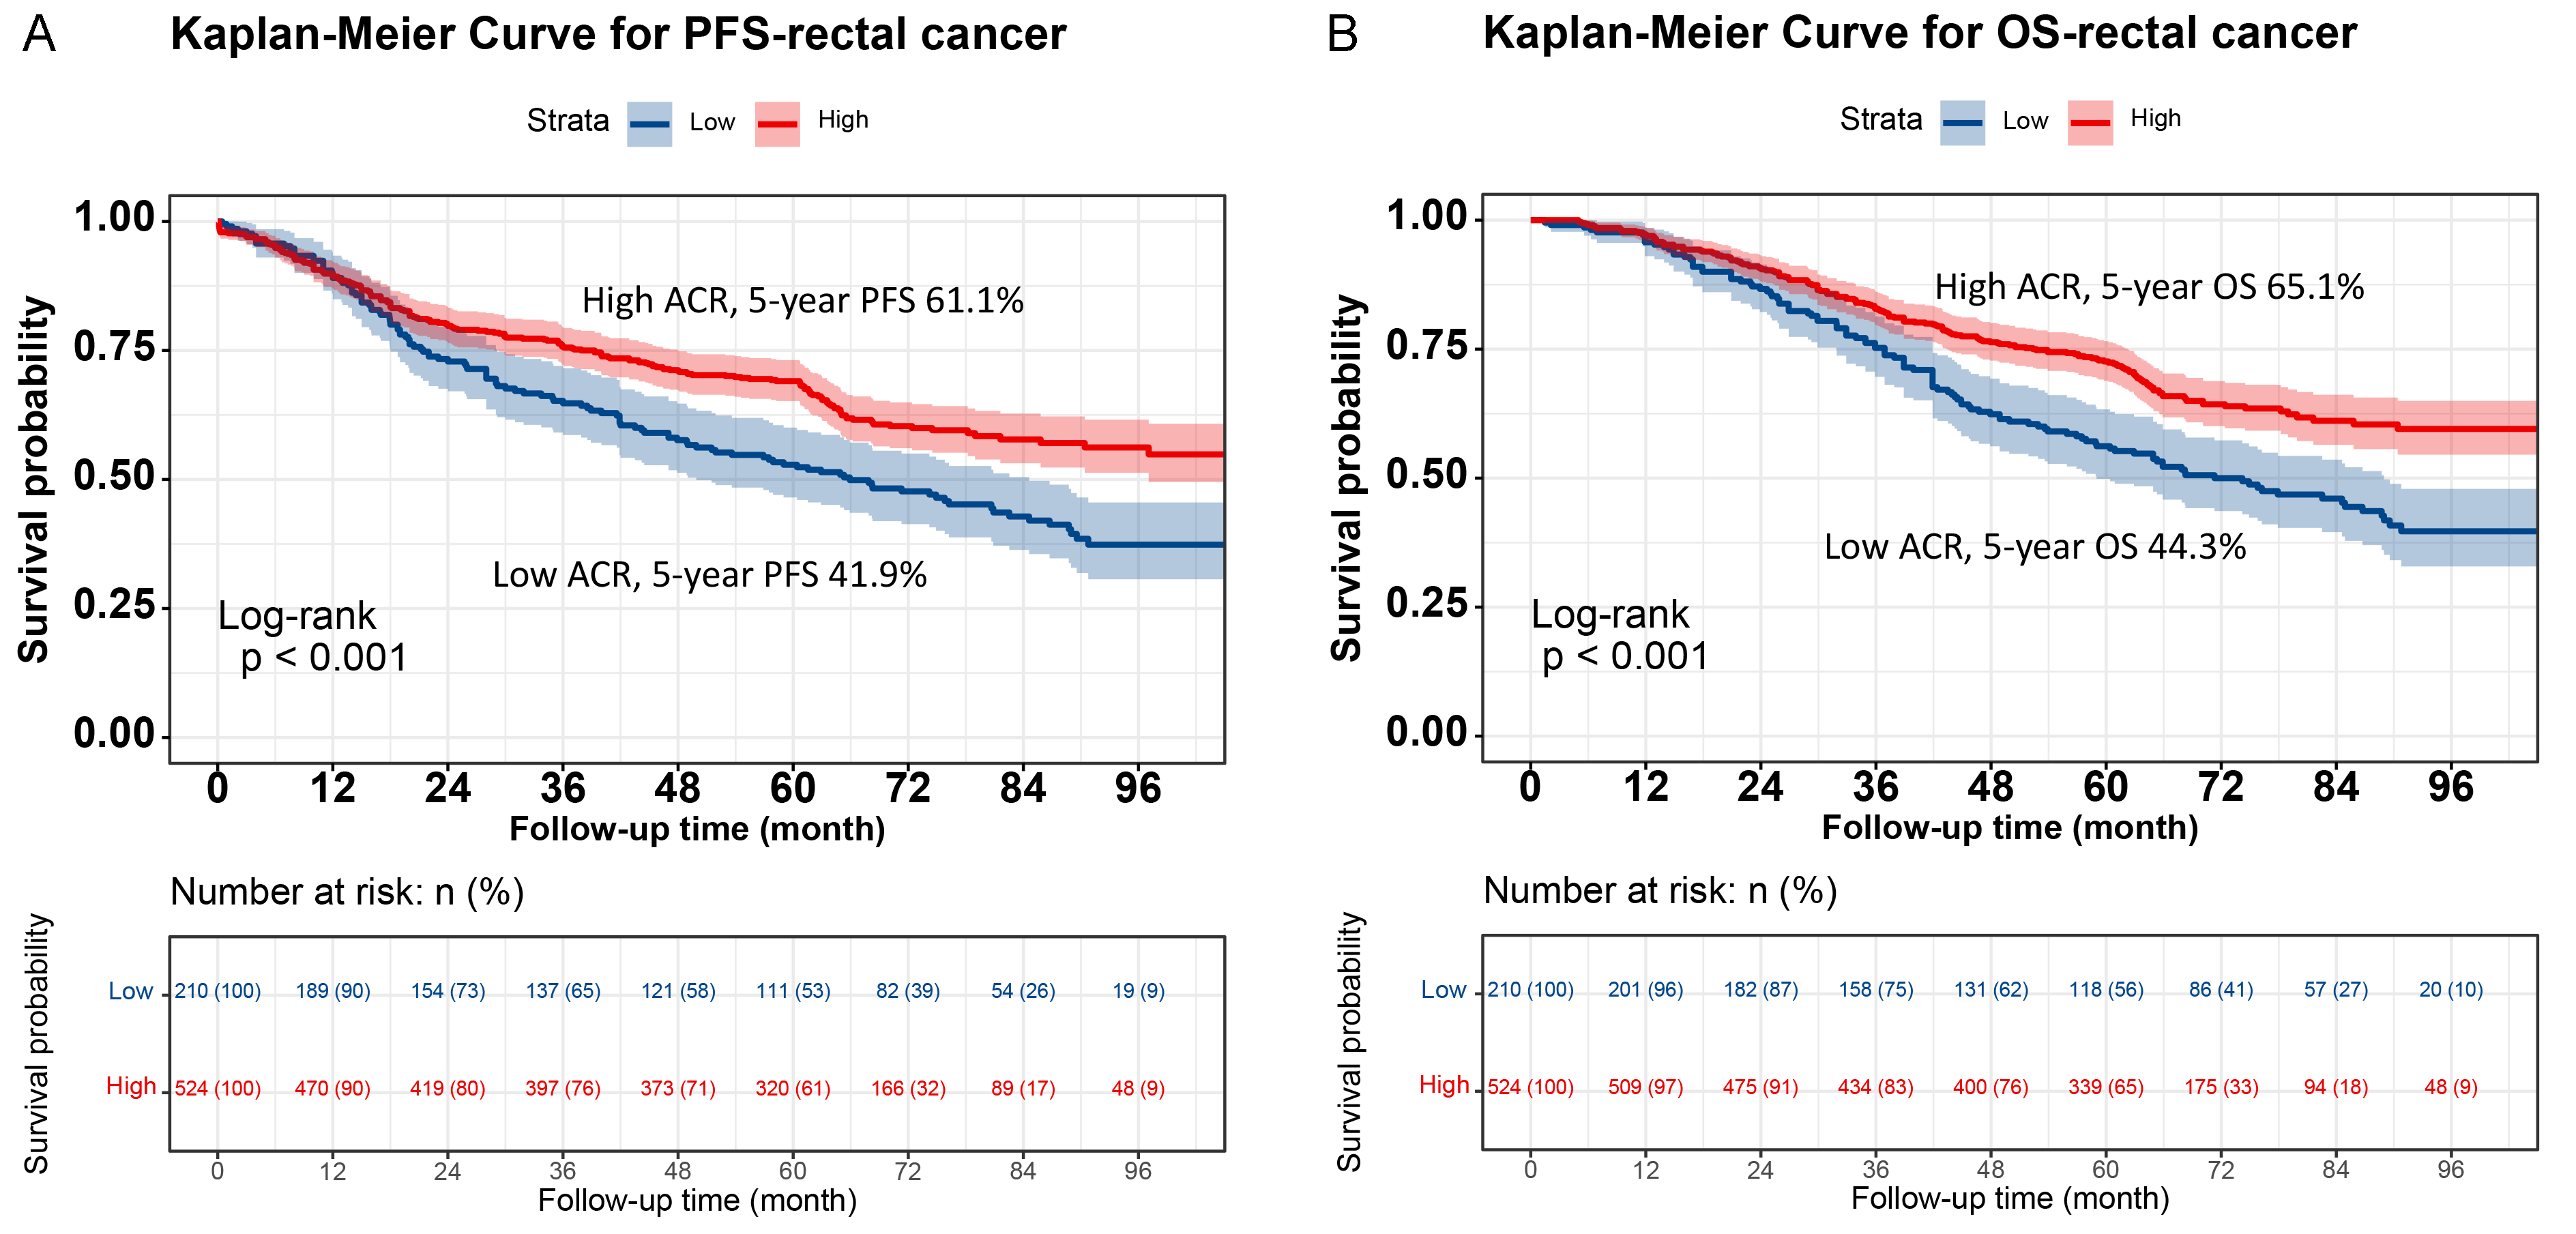


**Notes:** A, PFS; C, OS.

**Figure S5.** Stratified Kaplan-Meier curve of ACR based on CEA subgroup.


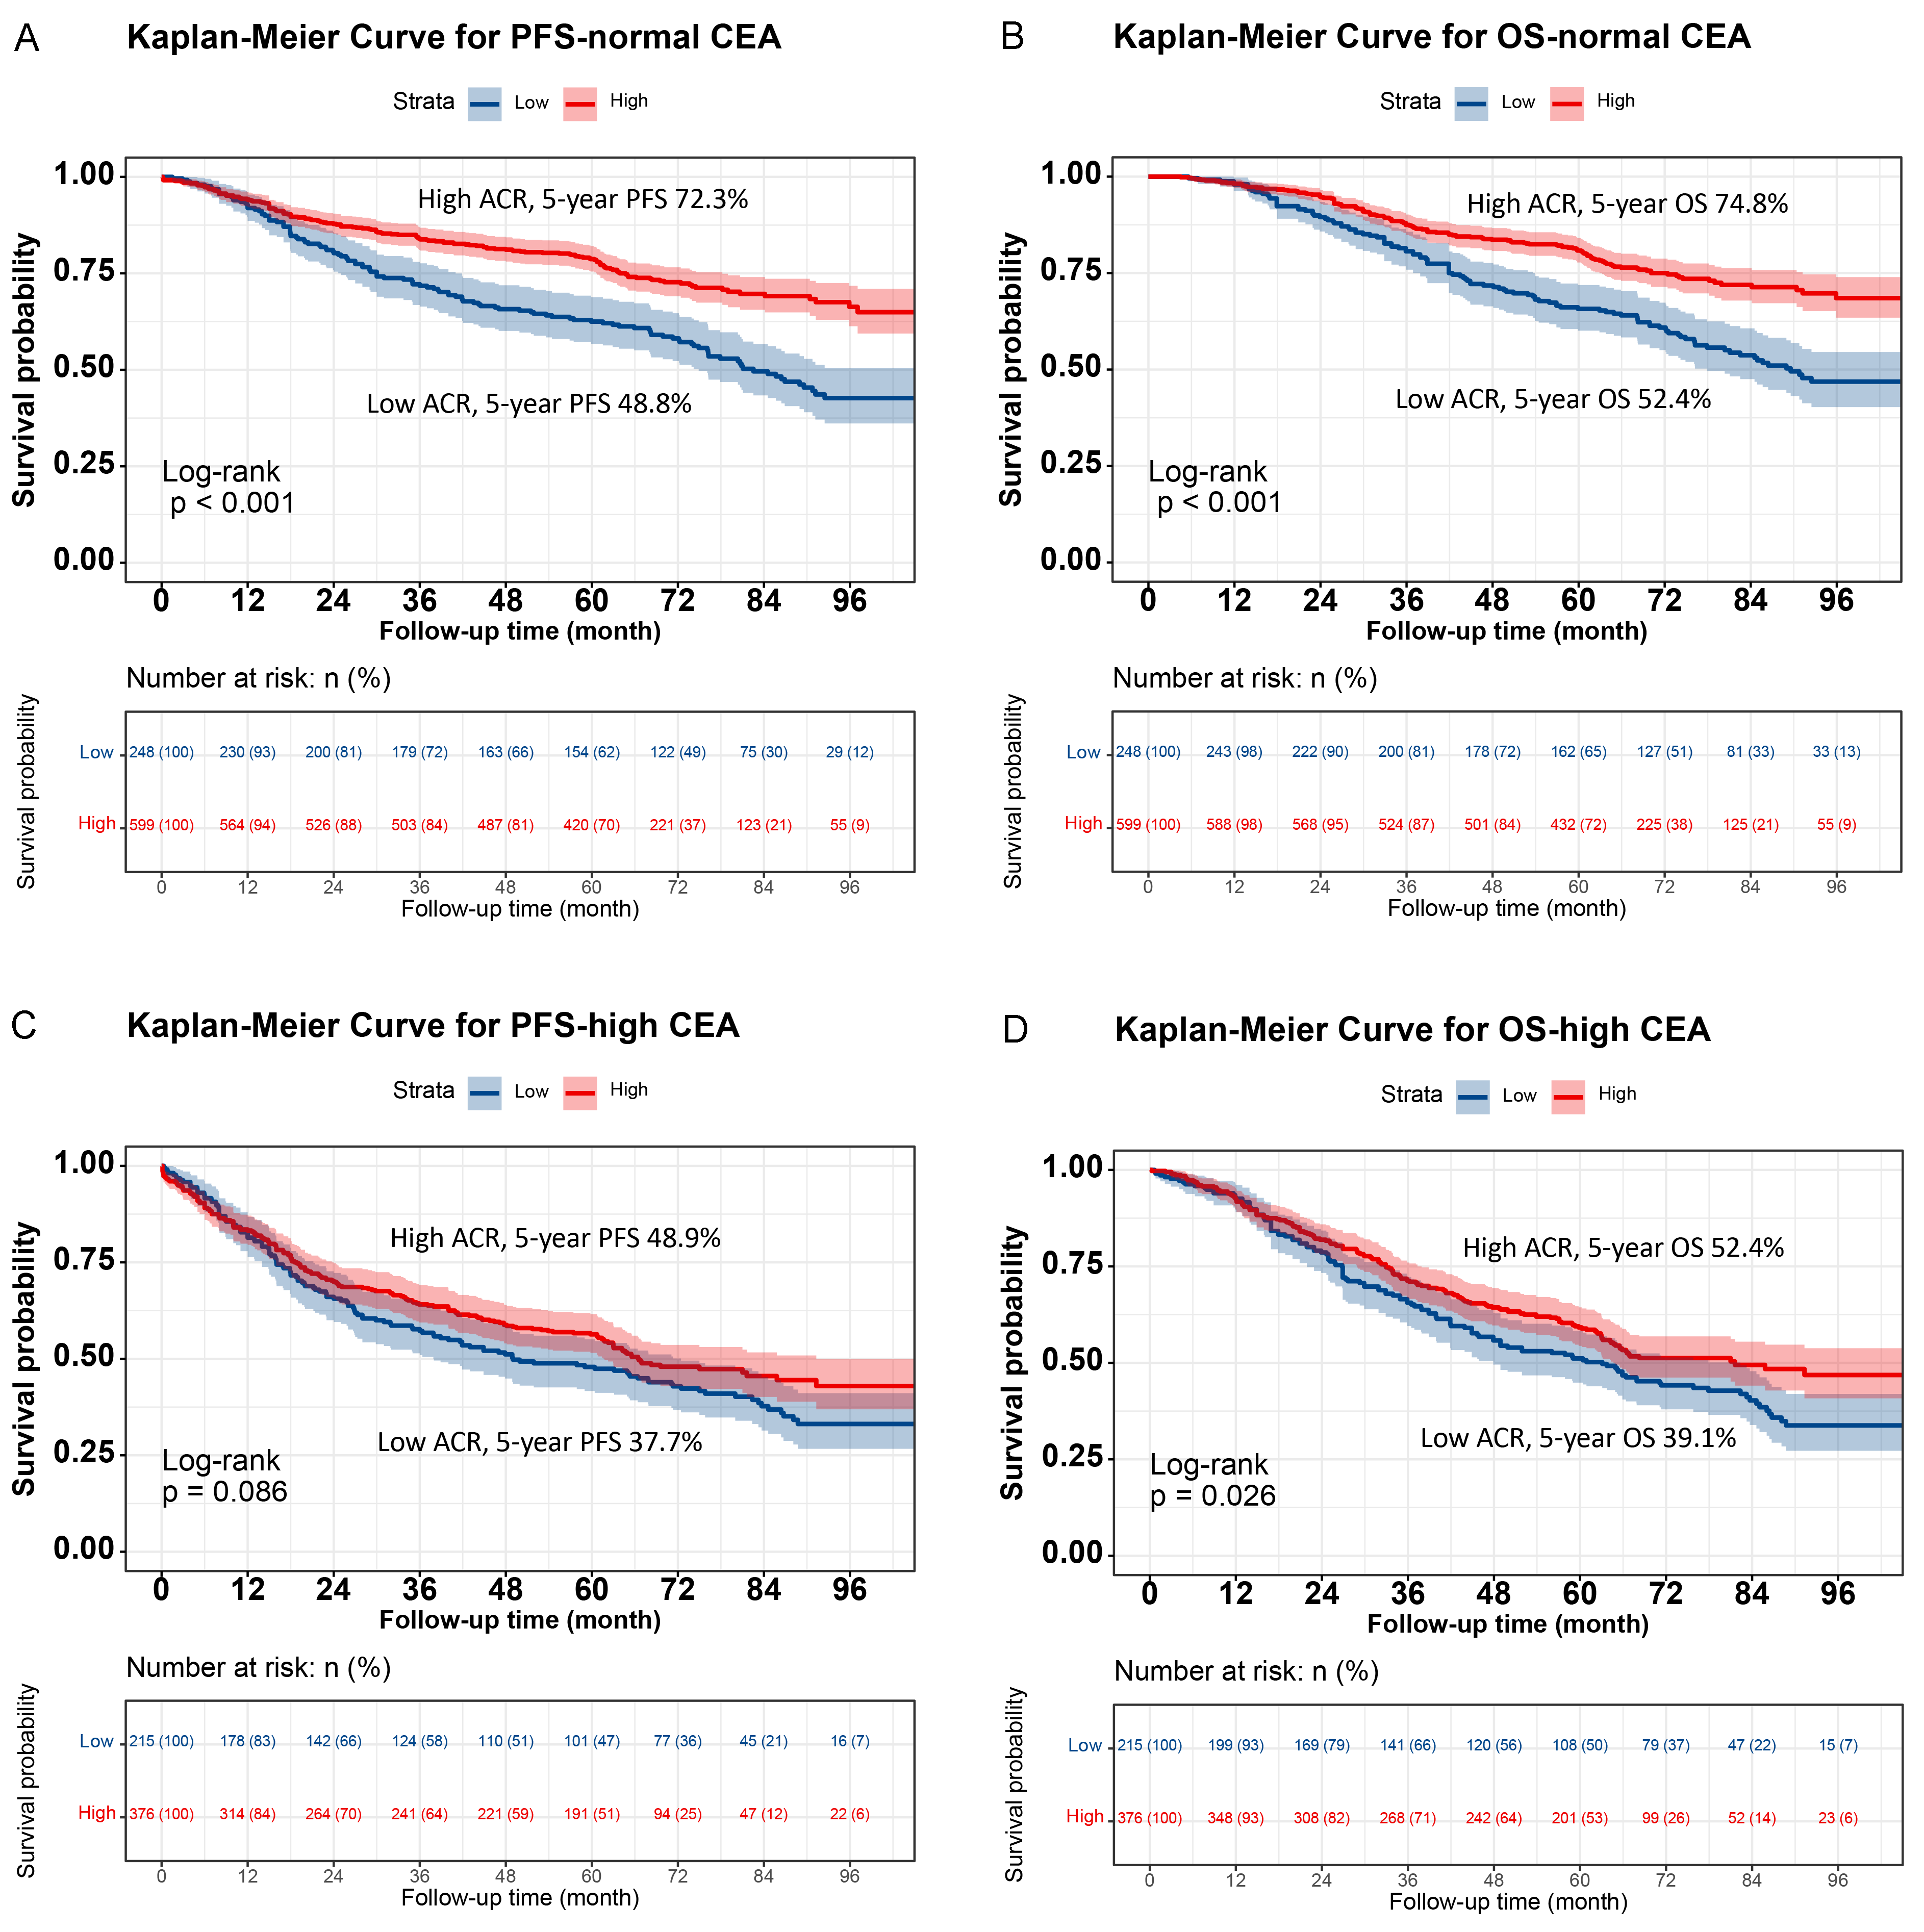


**Notes:** A, PFS-normal CEA; B, OS-normal CEA; C, PFS-high CEA; C, OS-high CEA.

**Figure S6.** The association between ACR and survival in patients with colorectal cancer.


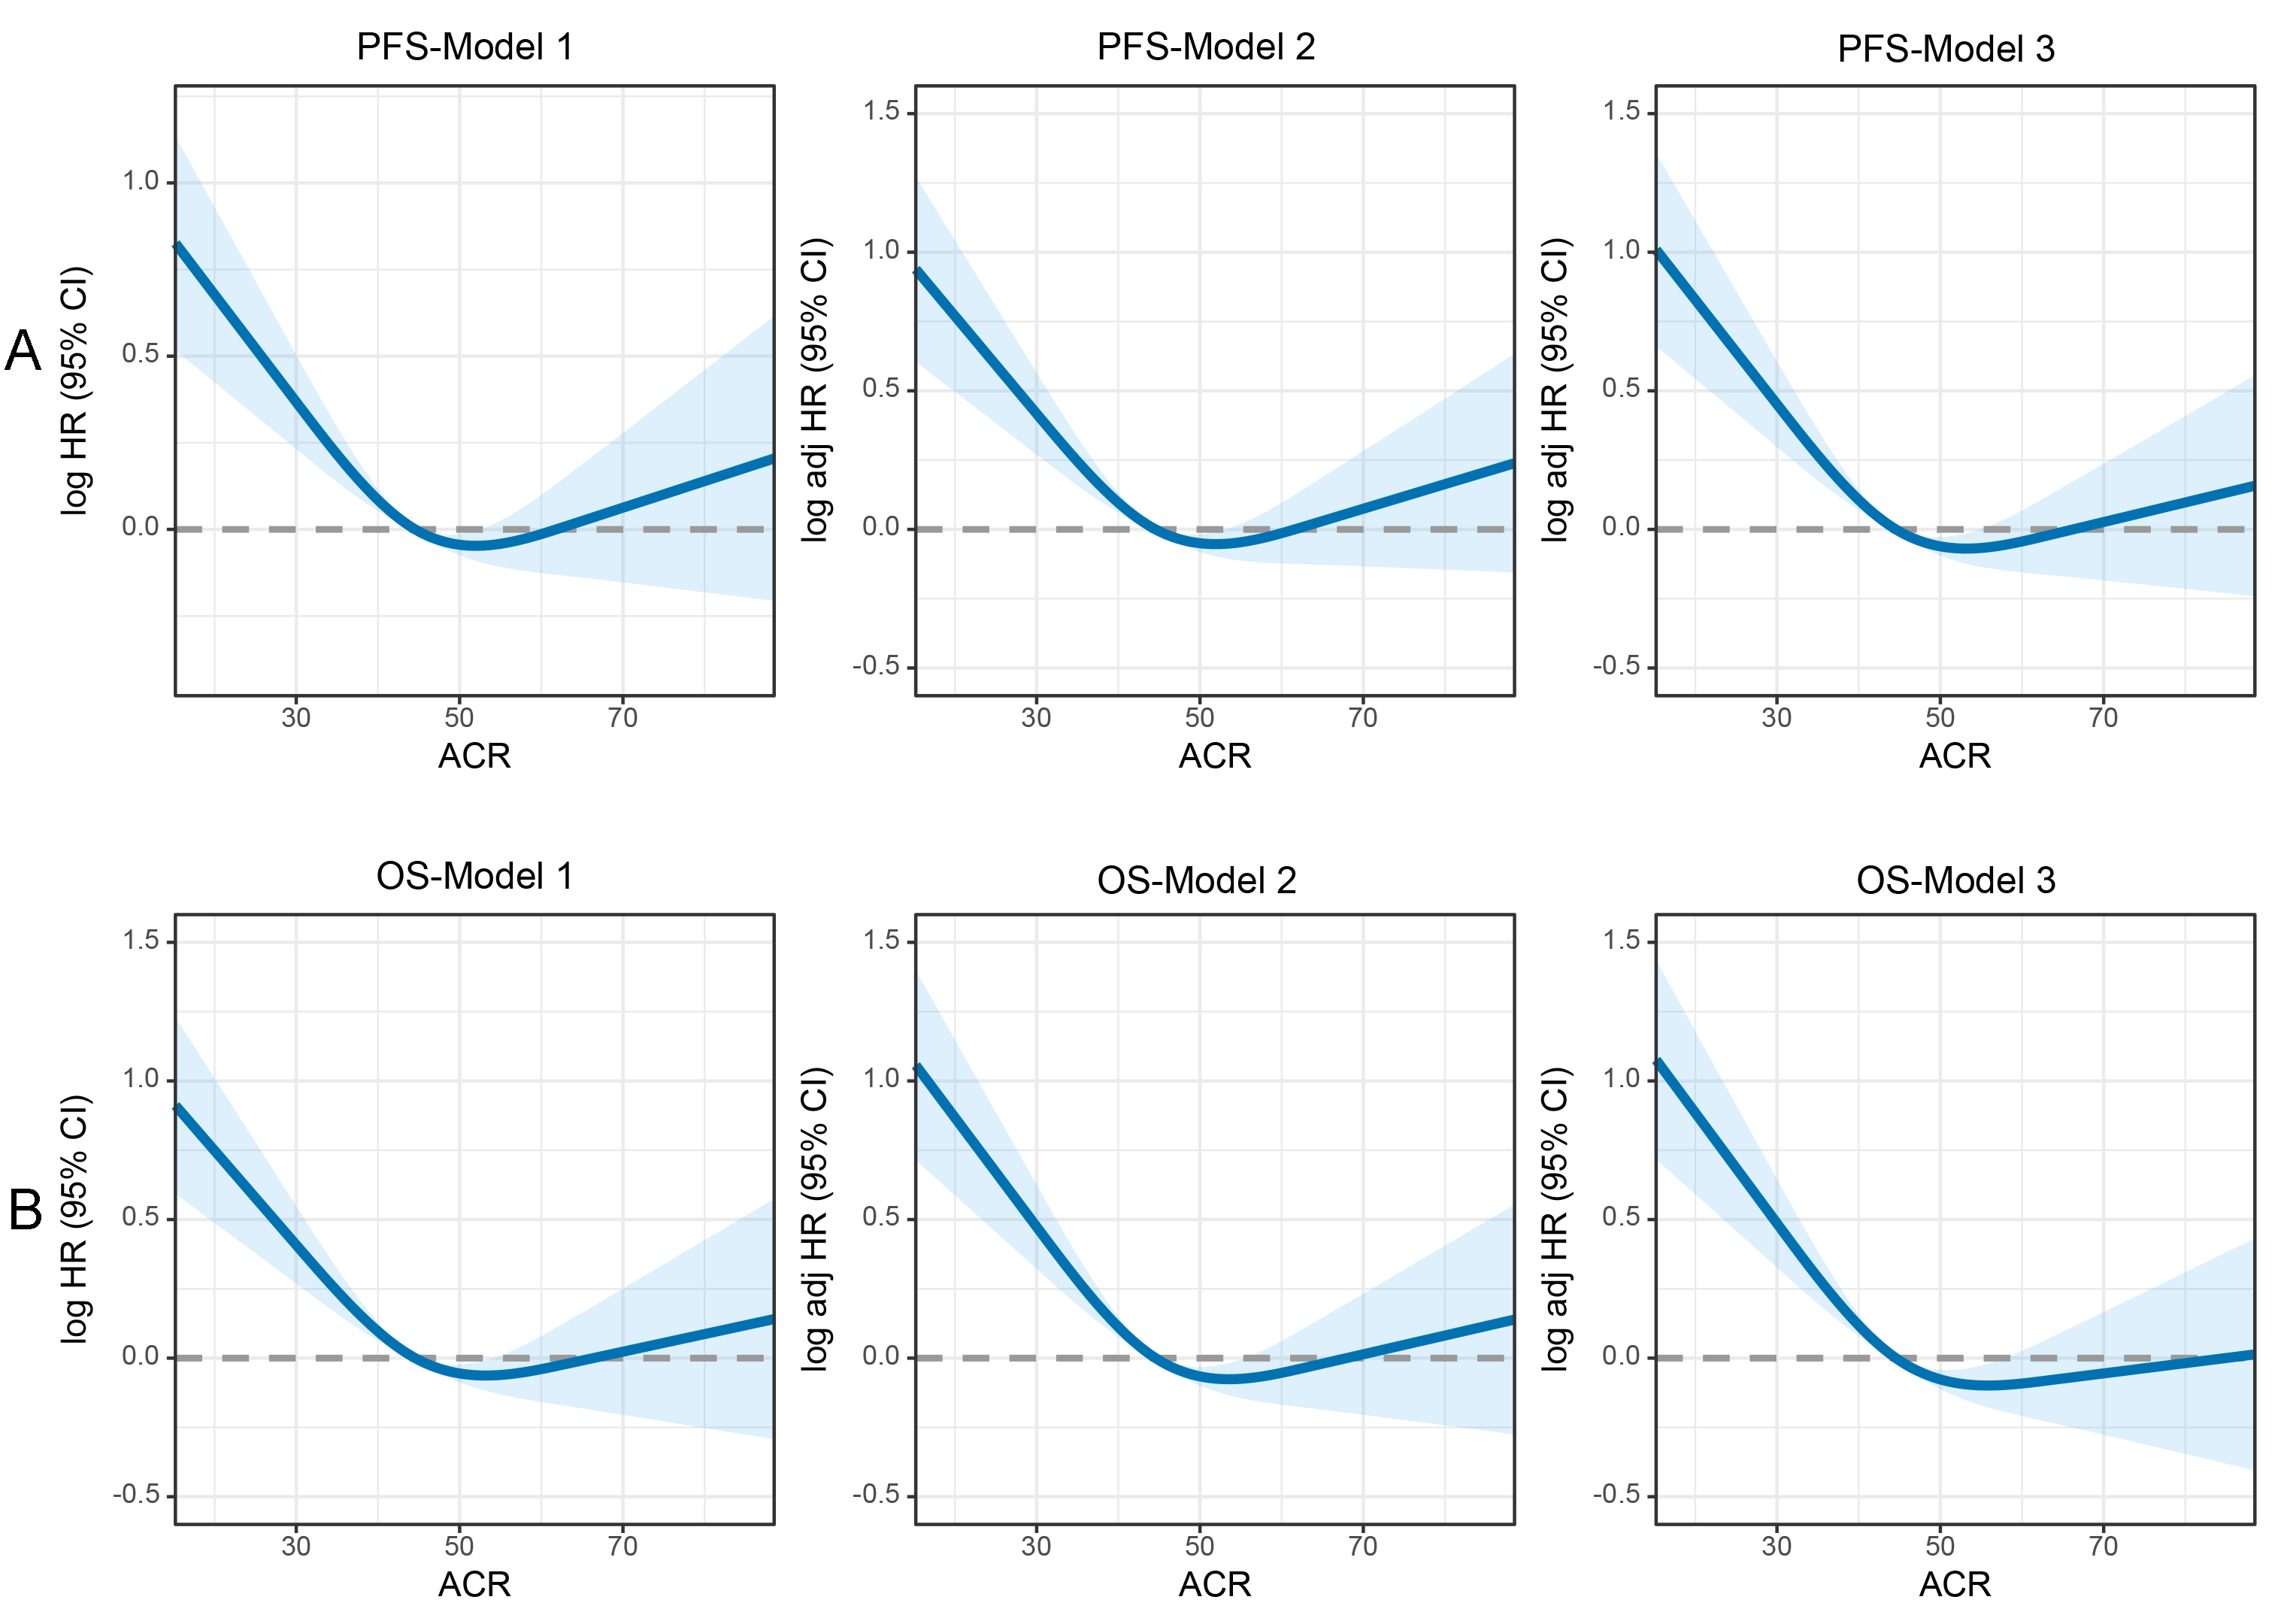


**Notes:**

A, PFS; B, OS.

Model 1: No adjusted.

Model 2: Adjusted for gender, age, and BMI.

Model 3: Adjusted for gender, age, BMI, hypertension, diabetes, T stage, N stage, M stage, tumor size, perineural invasion, vascular invasion, macroscopic type, differentiation, radiotherapy, chemotherapy.

**Figure S7.** Construction the PFS nomogram in CRC patients.

**
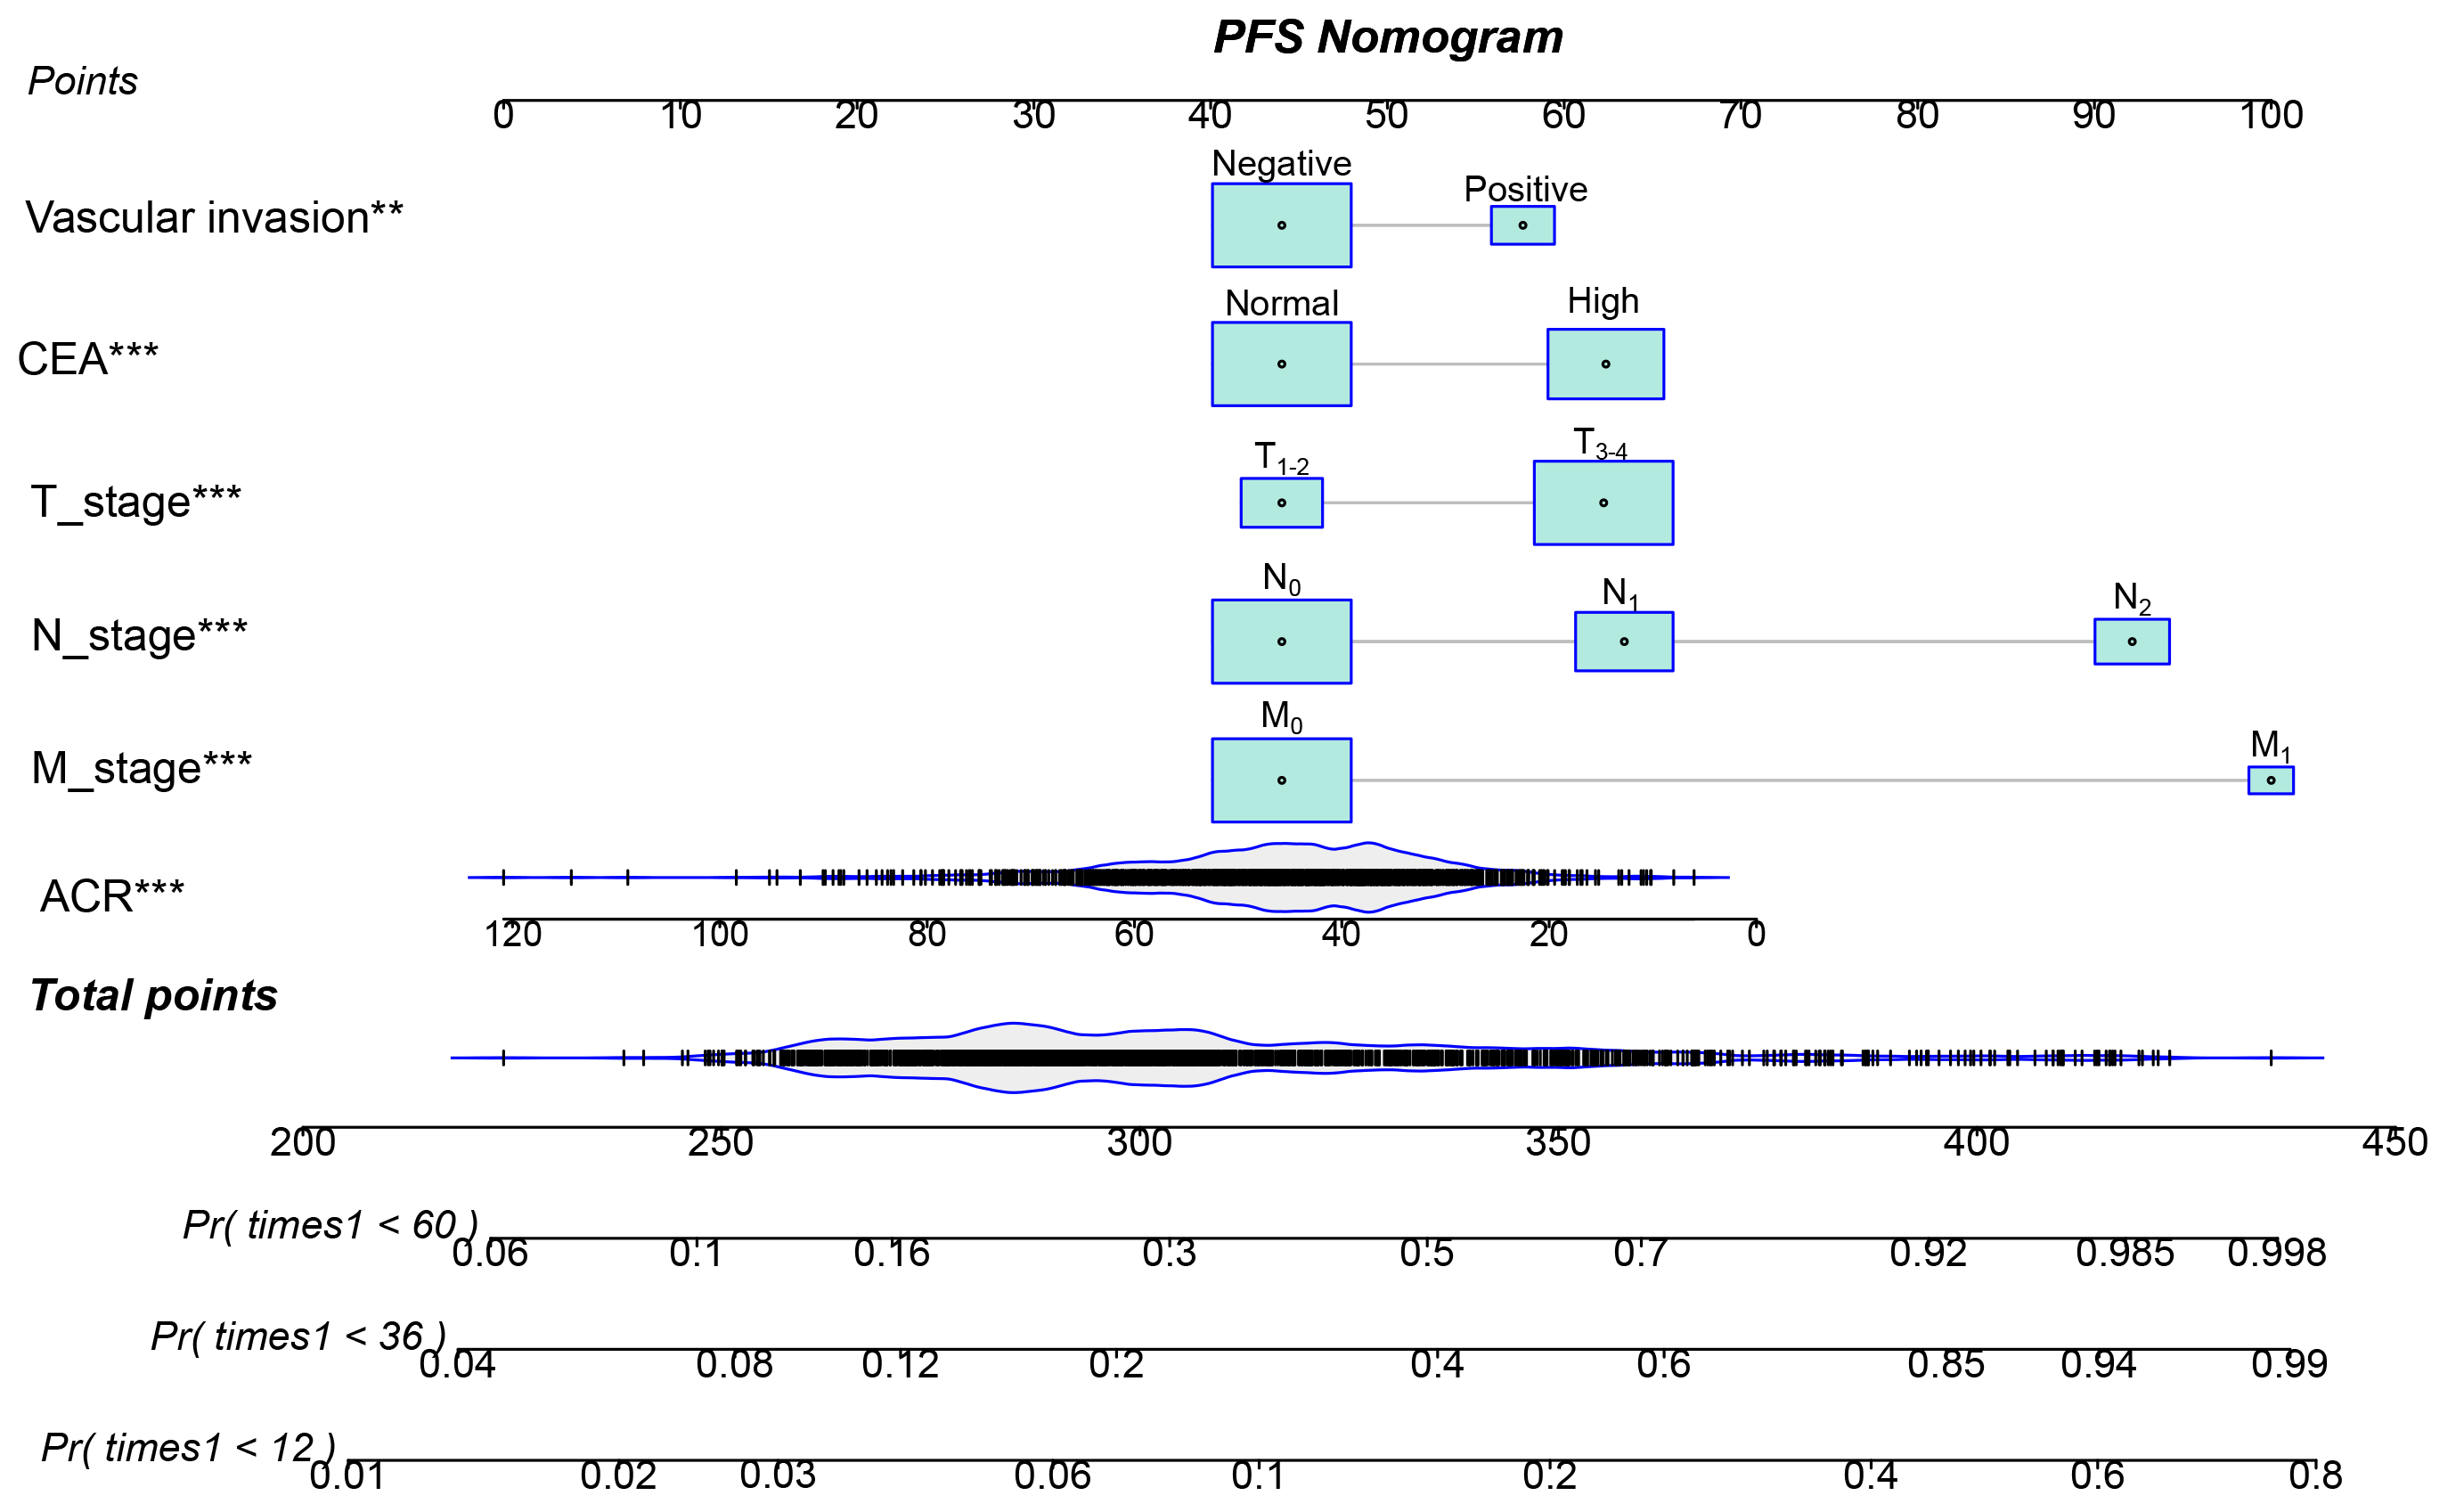
**

**Figure S8.** Construction the OS nomogram in CRC patients.

**
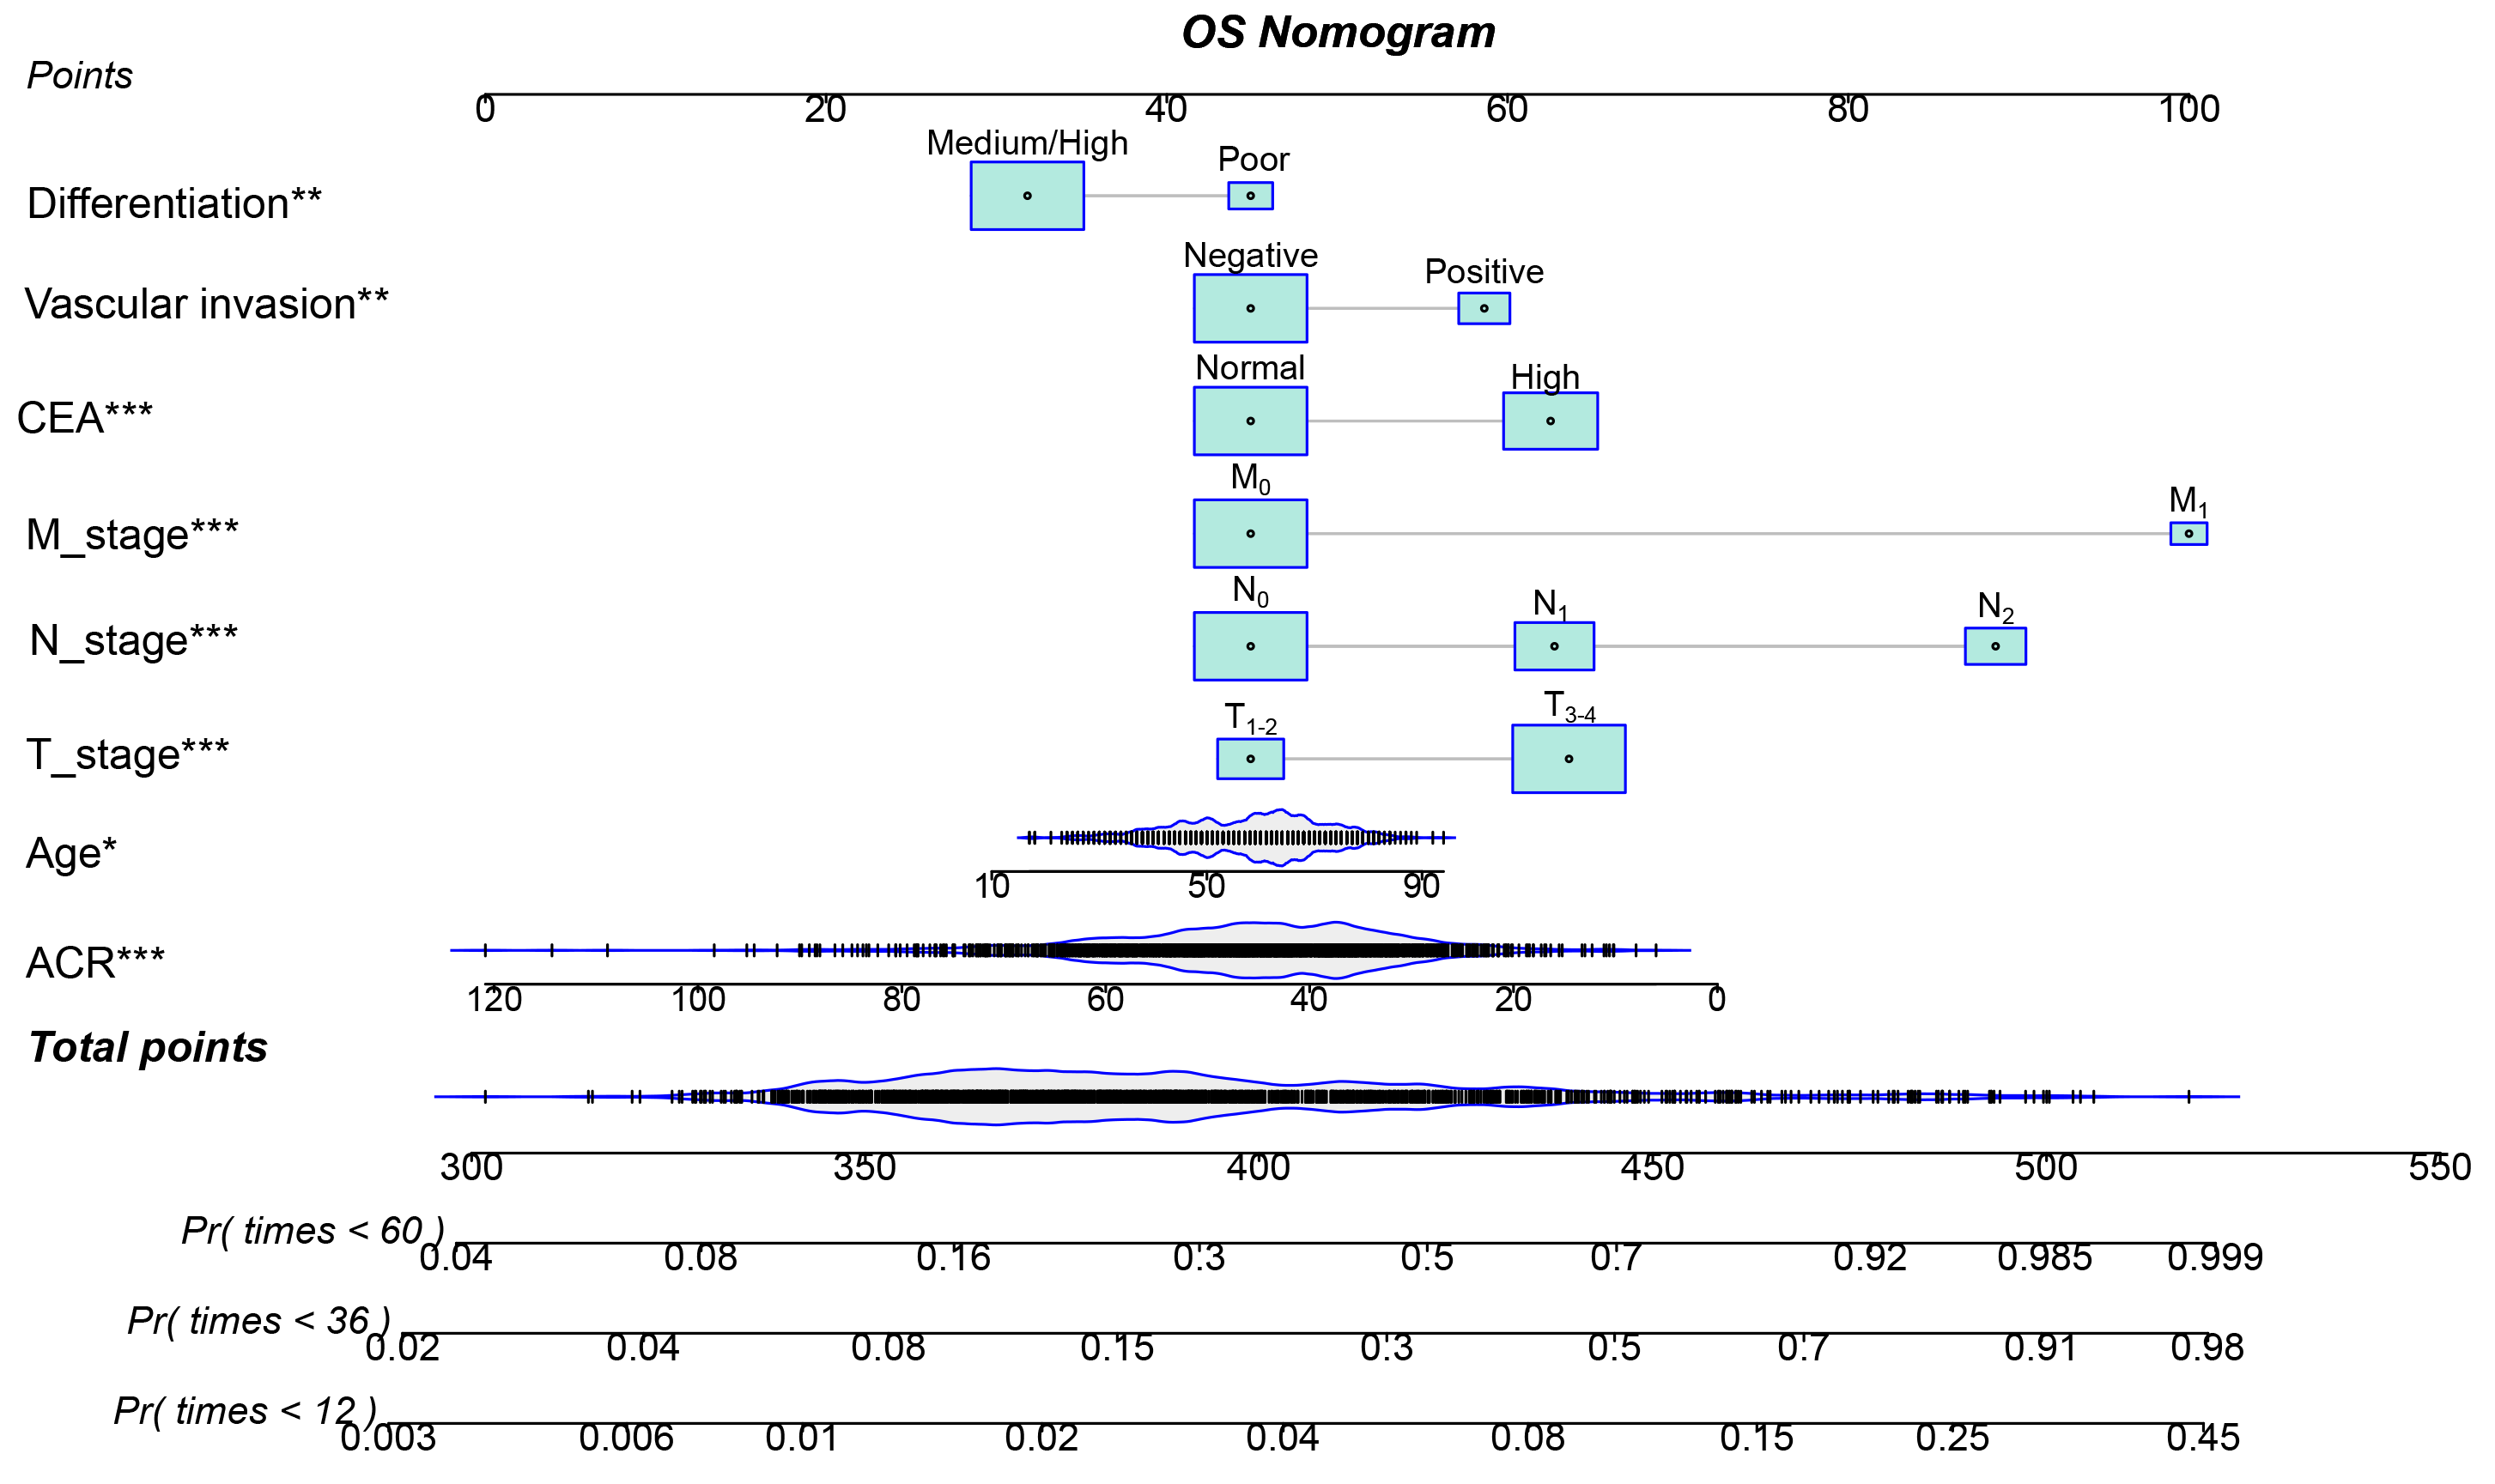
**

**Figure S9.** The 1-, 3-, and 5-year ROC of PFS and OS nomograms.

**
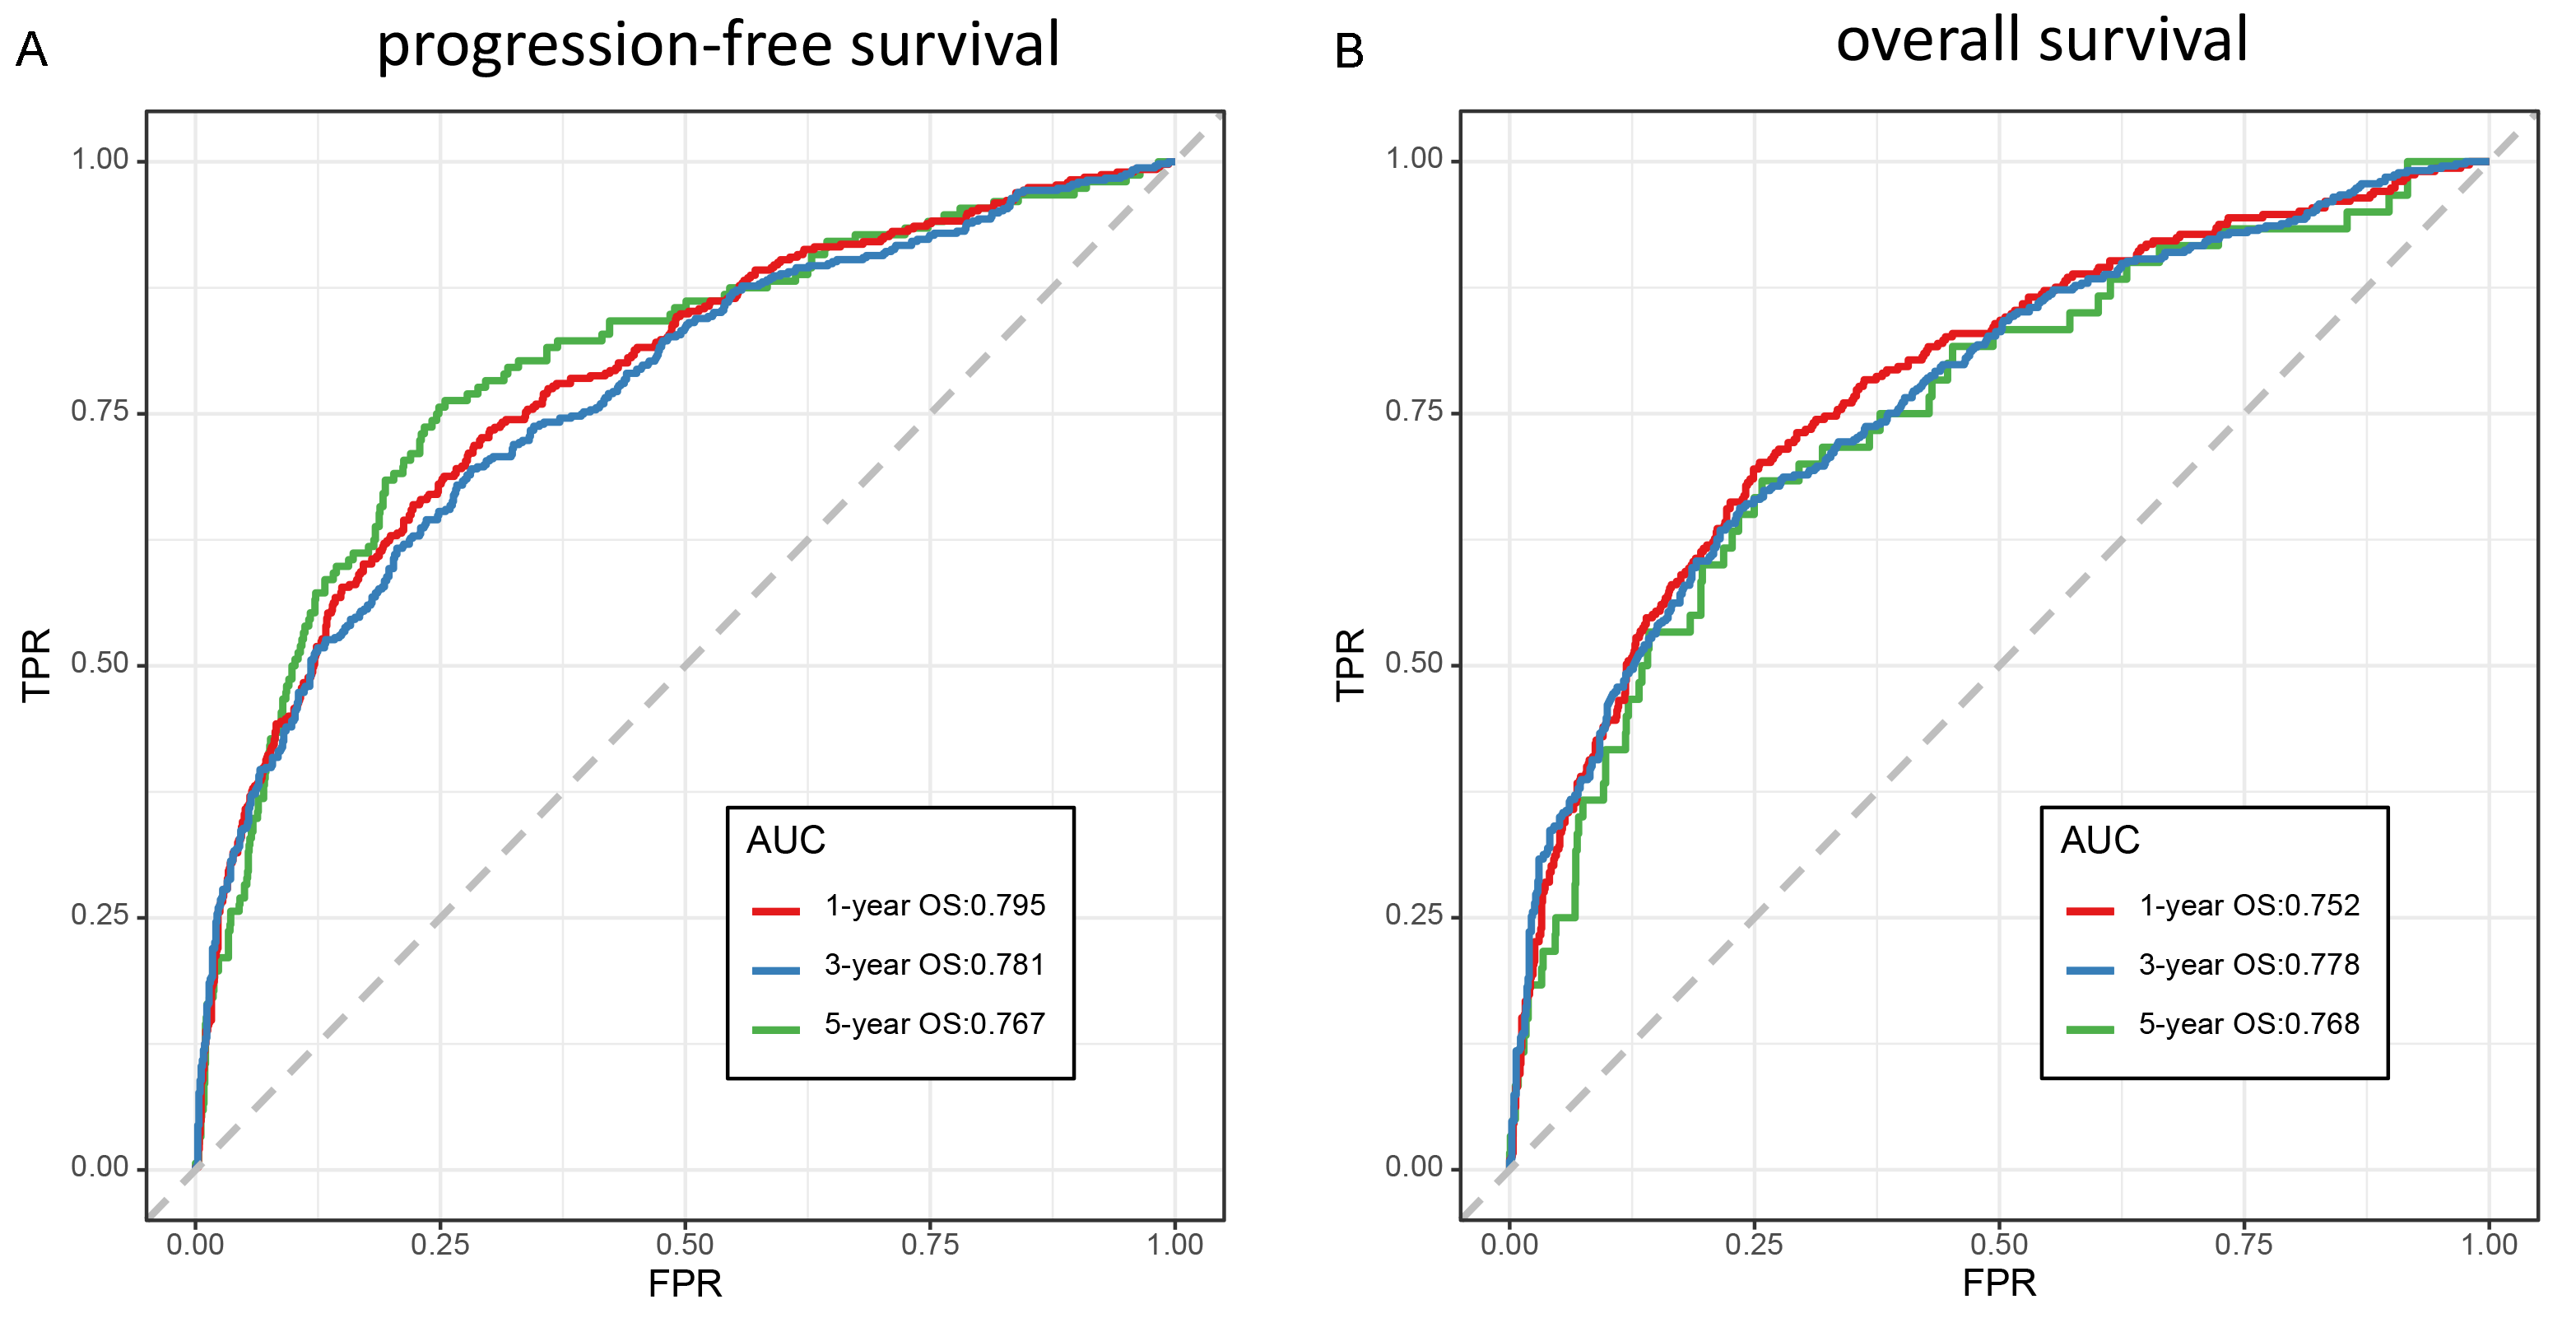
**

**Notes:** A, PFS; B, OS.

**Figure S10.** Calibration curve of the PFS/OS nomograms.

**
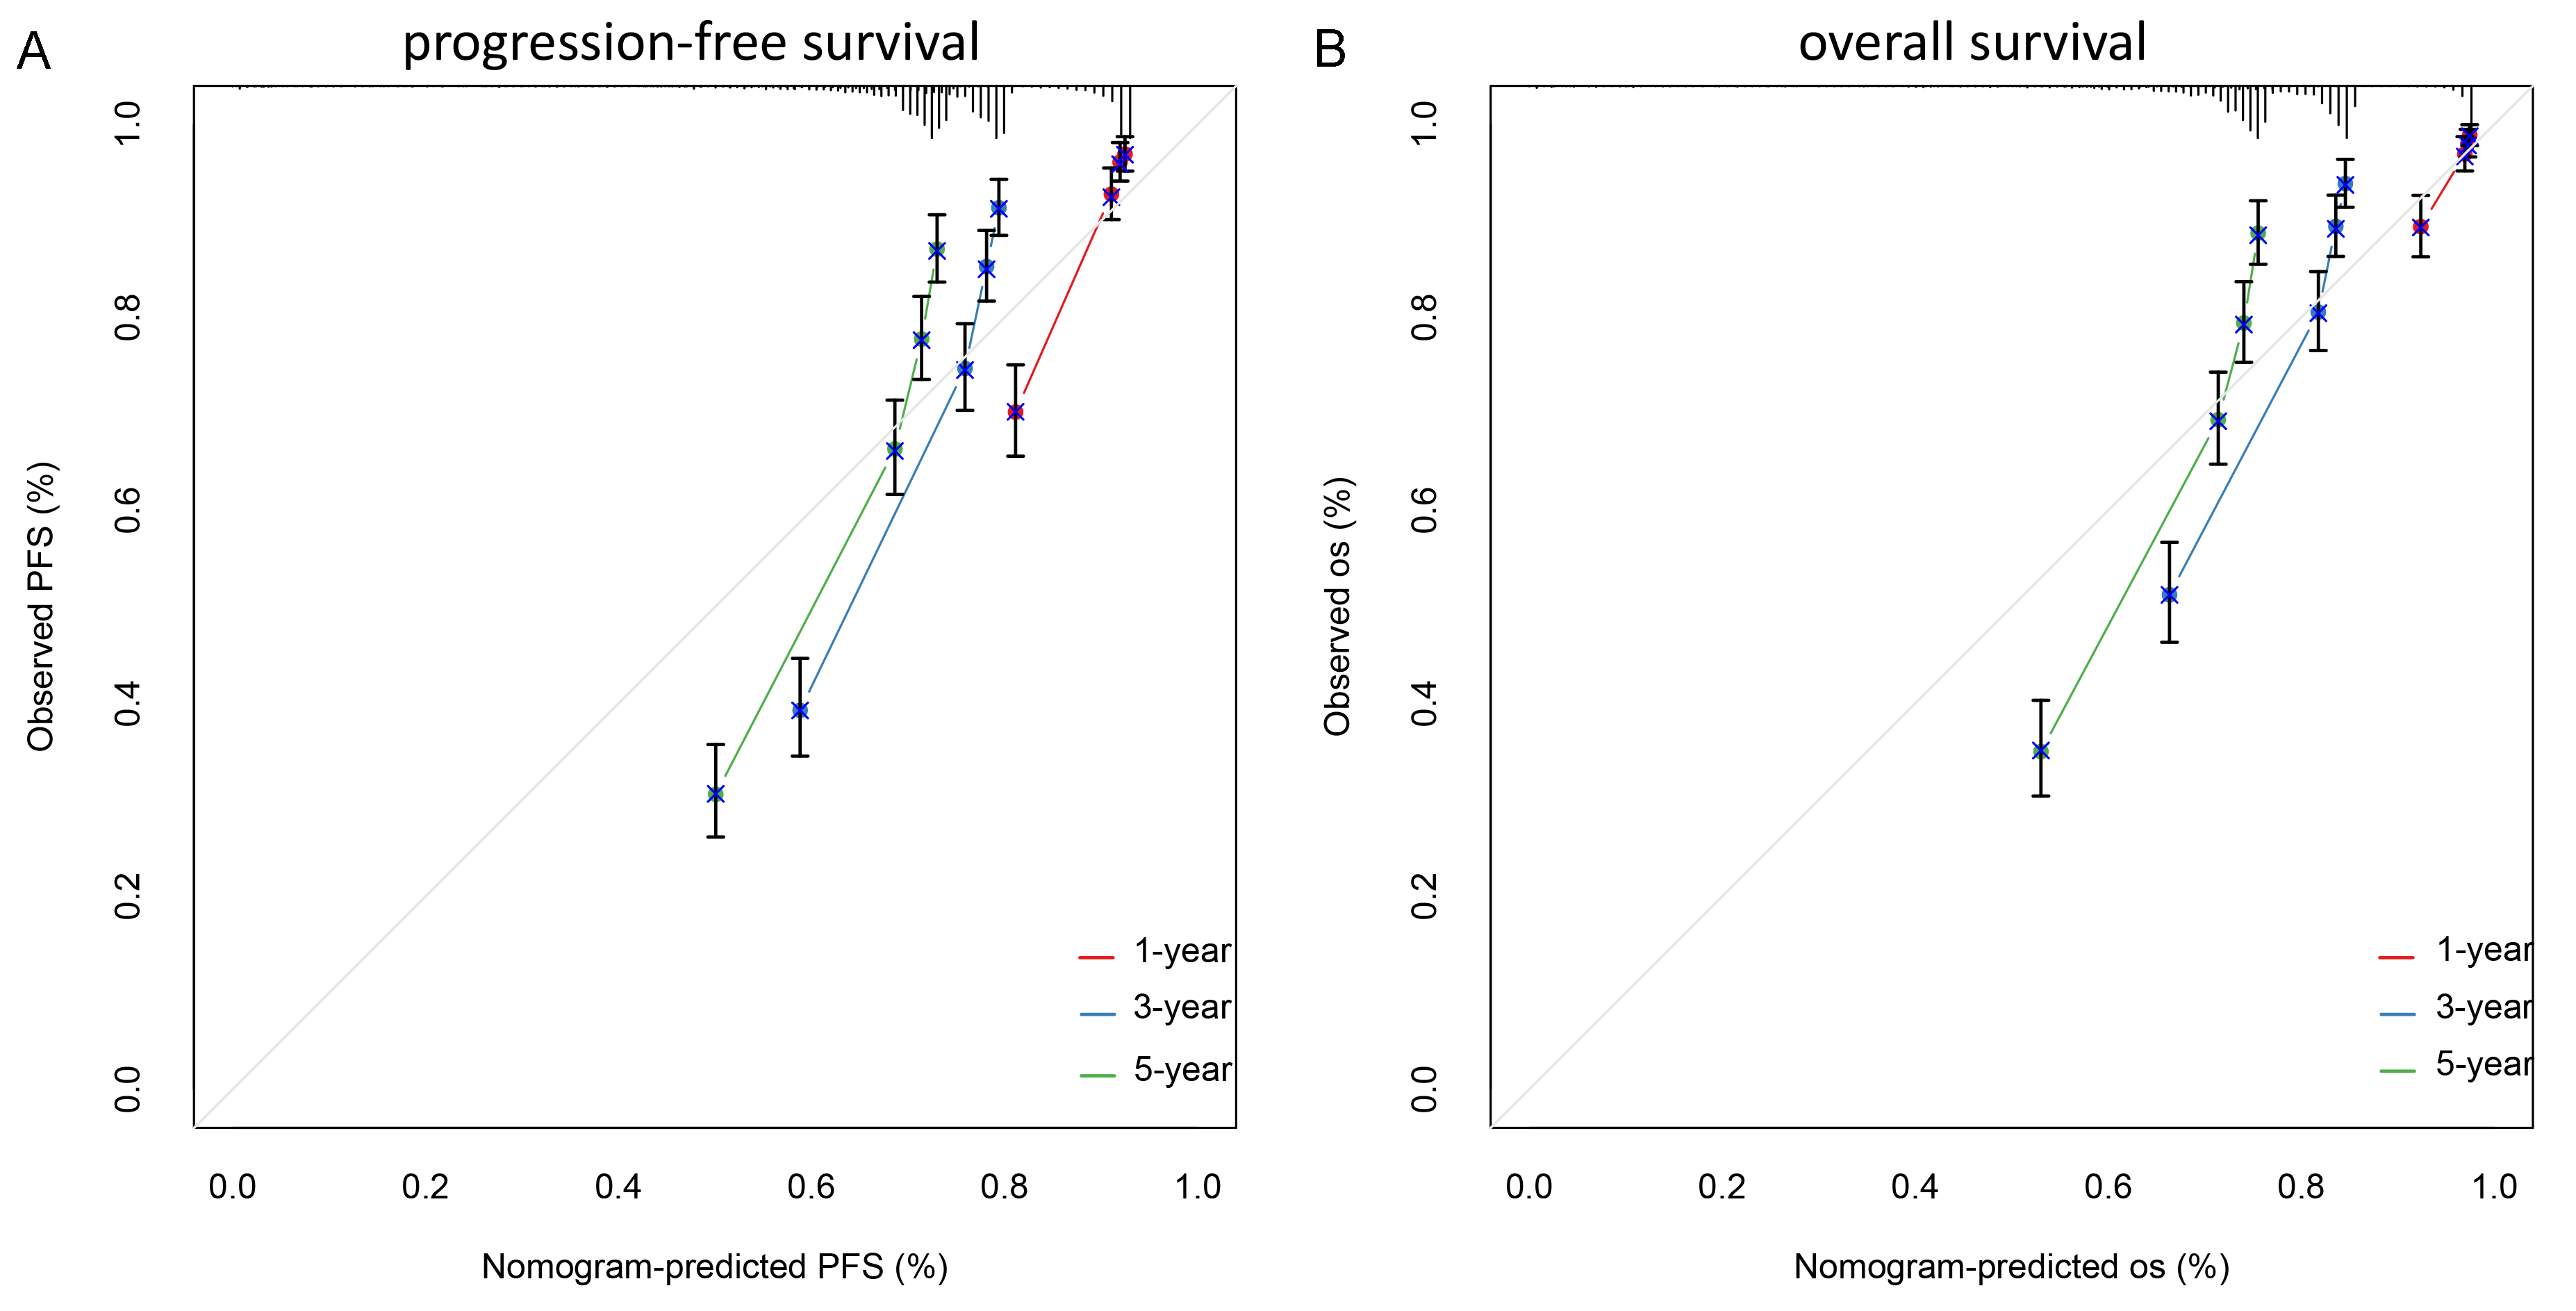
**

**Notes:** A, PFS; B, OS.

**Figure S11.** The DCA of PFS/OS nomograms.

**
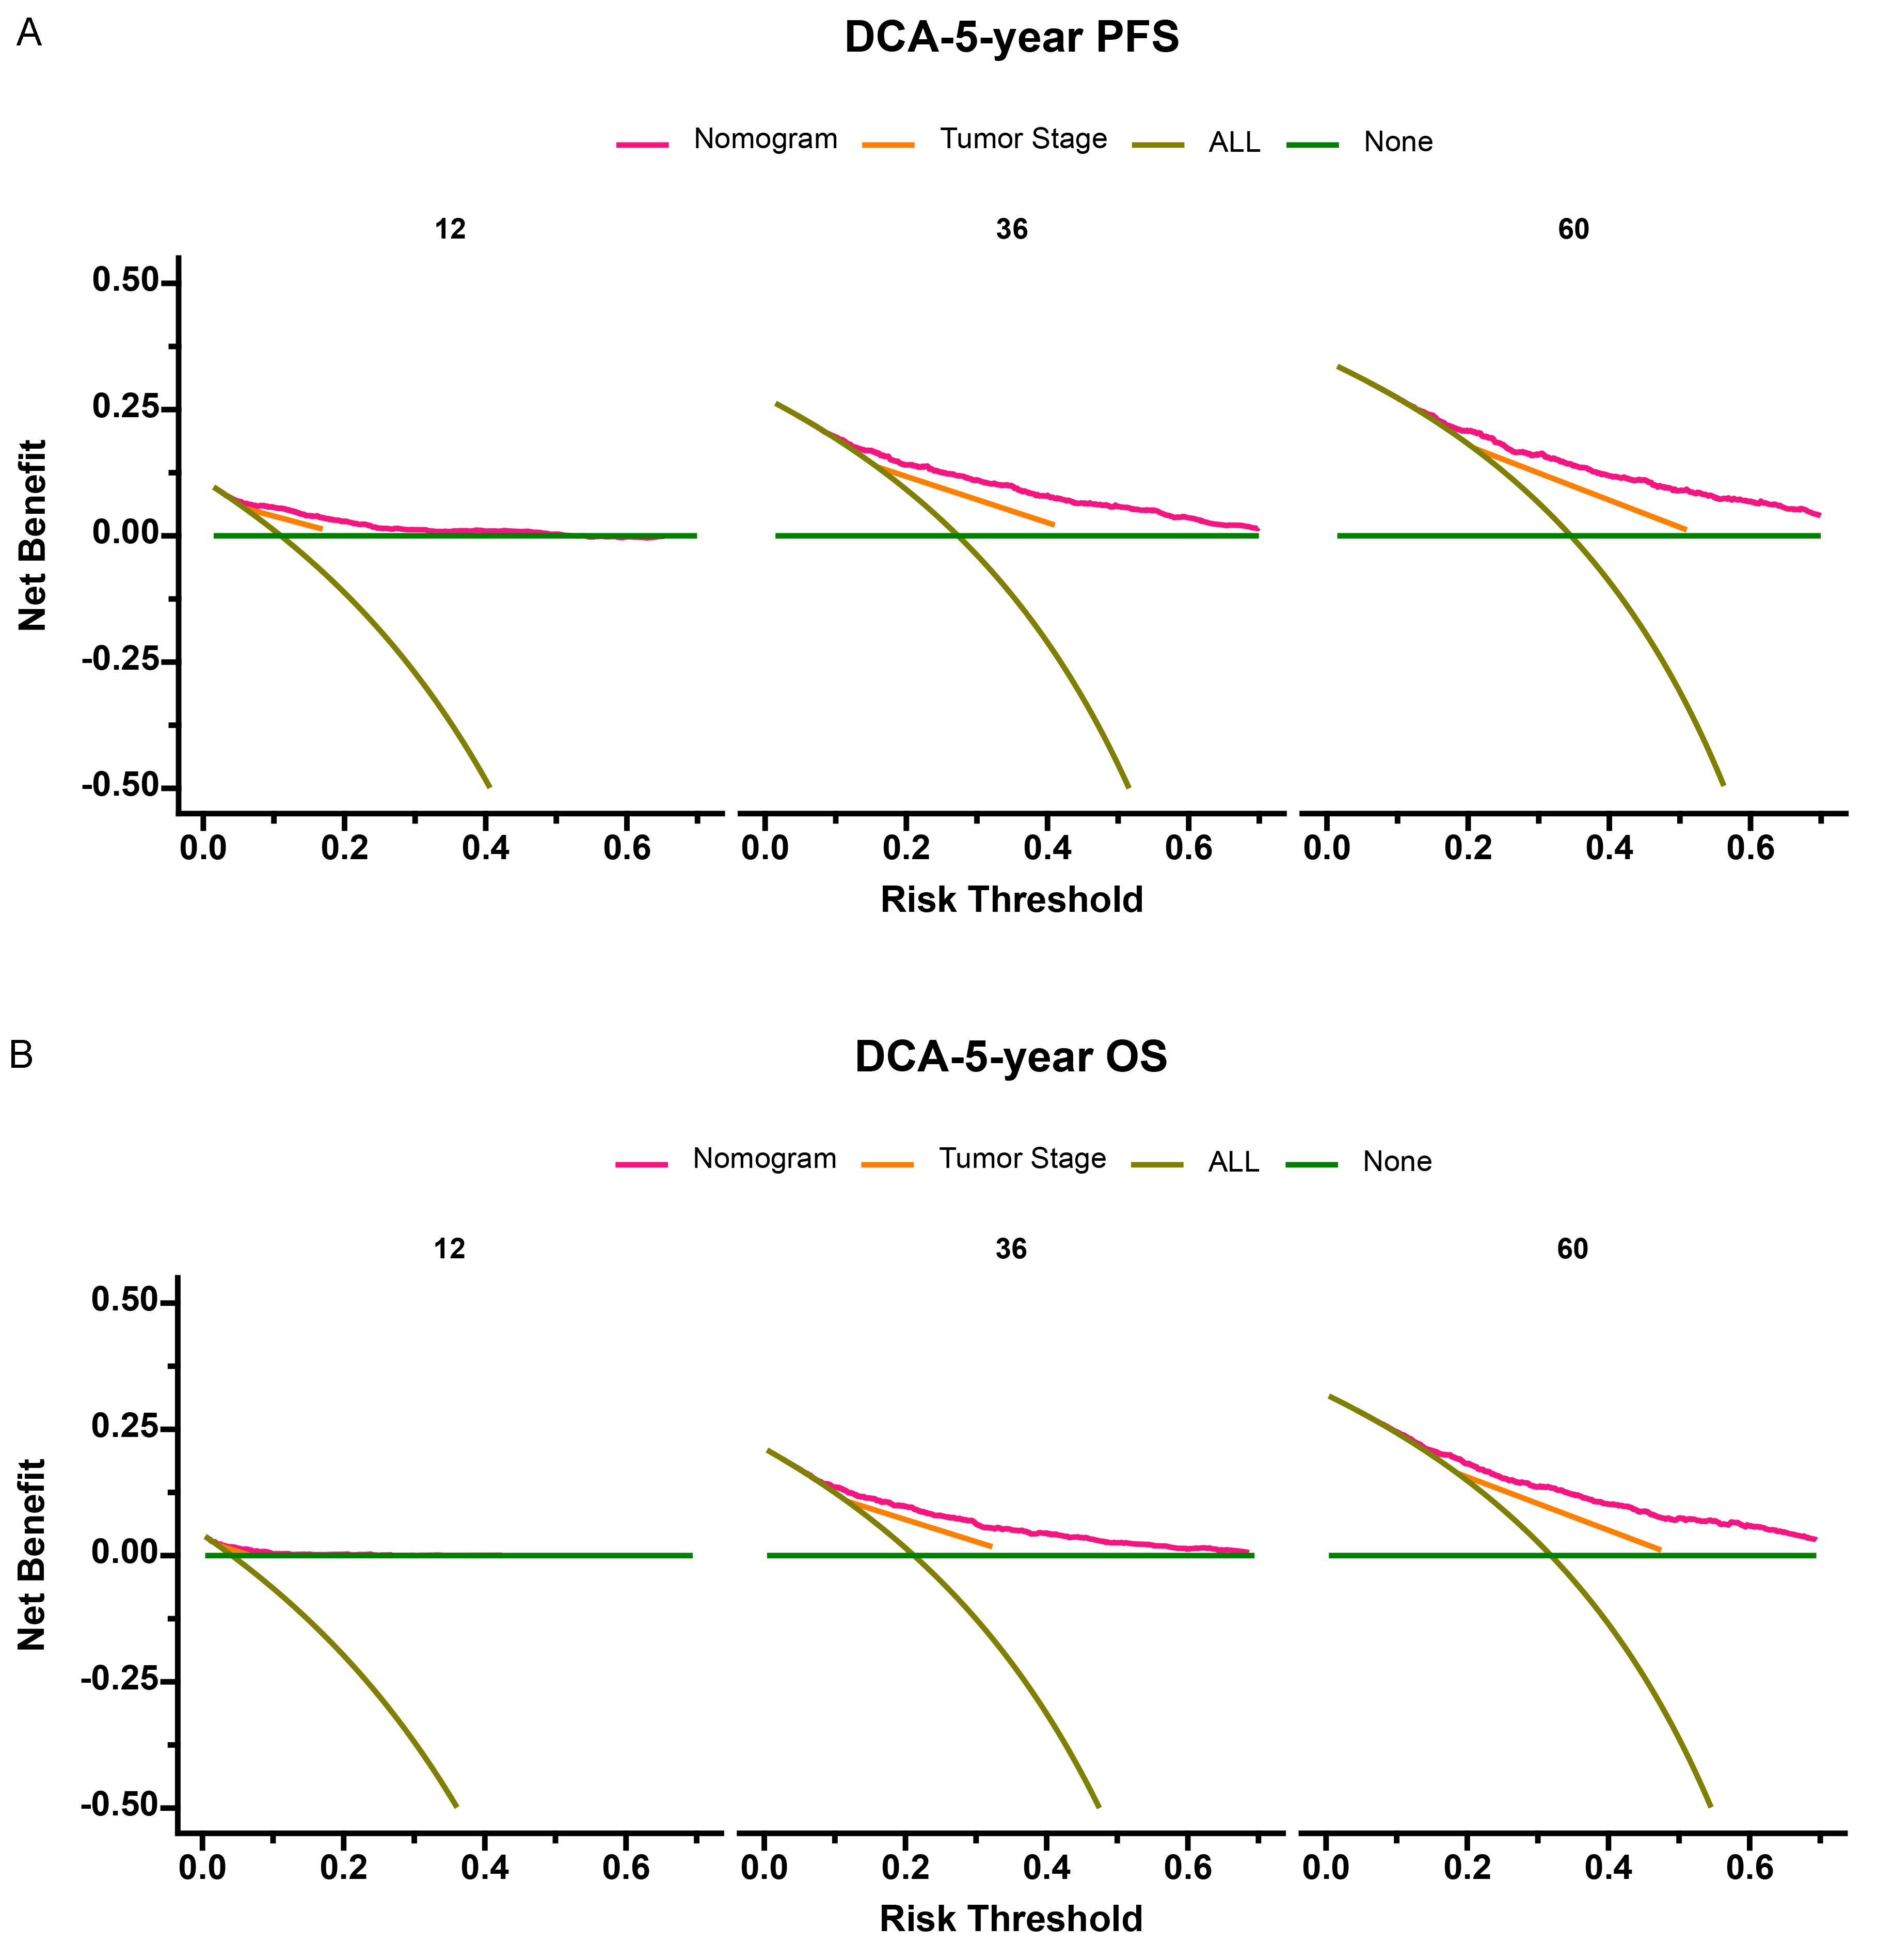
**

**Notes:** A, PFS; B, OS.

**Figure S12.** Kaplan-Meier curve of low and high score of nomograms in patients with colorectal cancer.

**
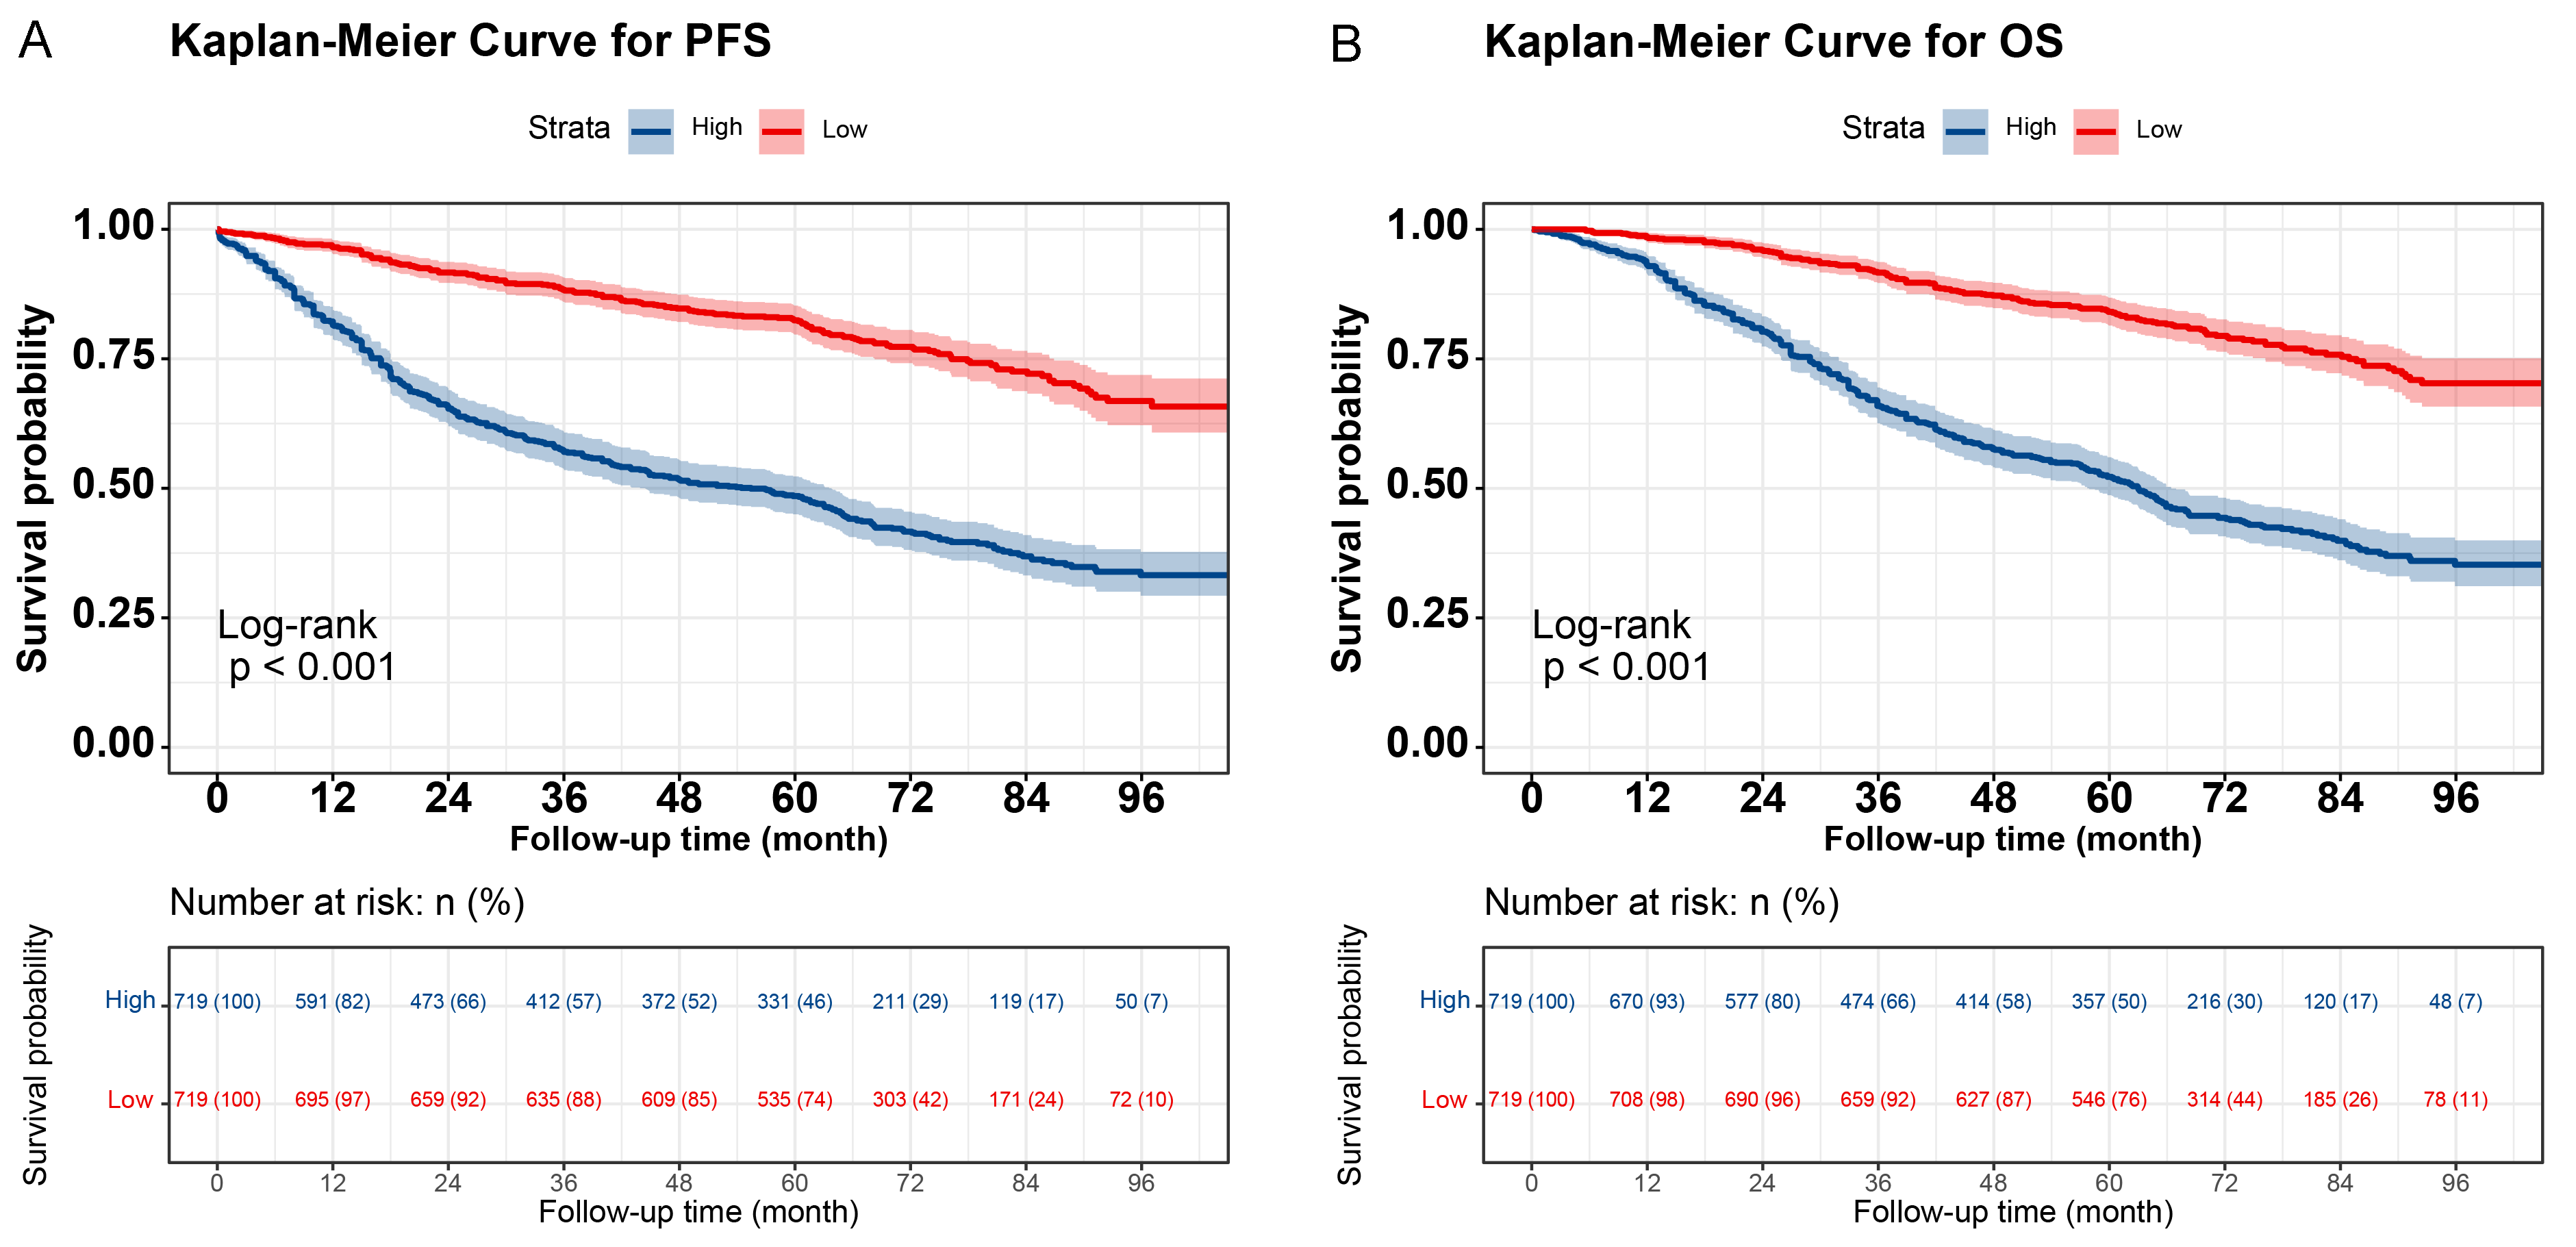
**

**Notes:** A, PFS nomogram; B, OS nomogram.

**Figure S13** The validation cohort A of Kaplan-Meier curve of ACR.

**
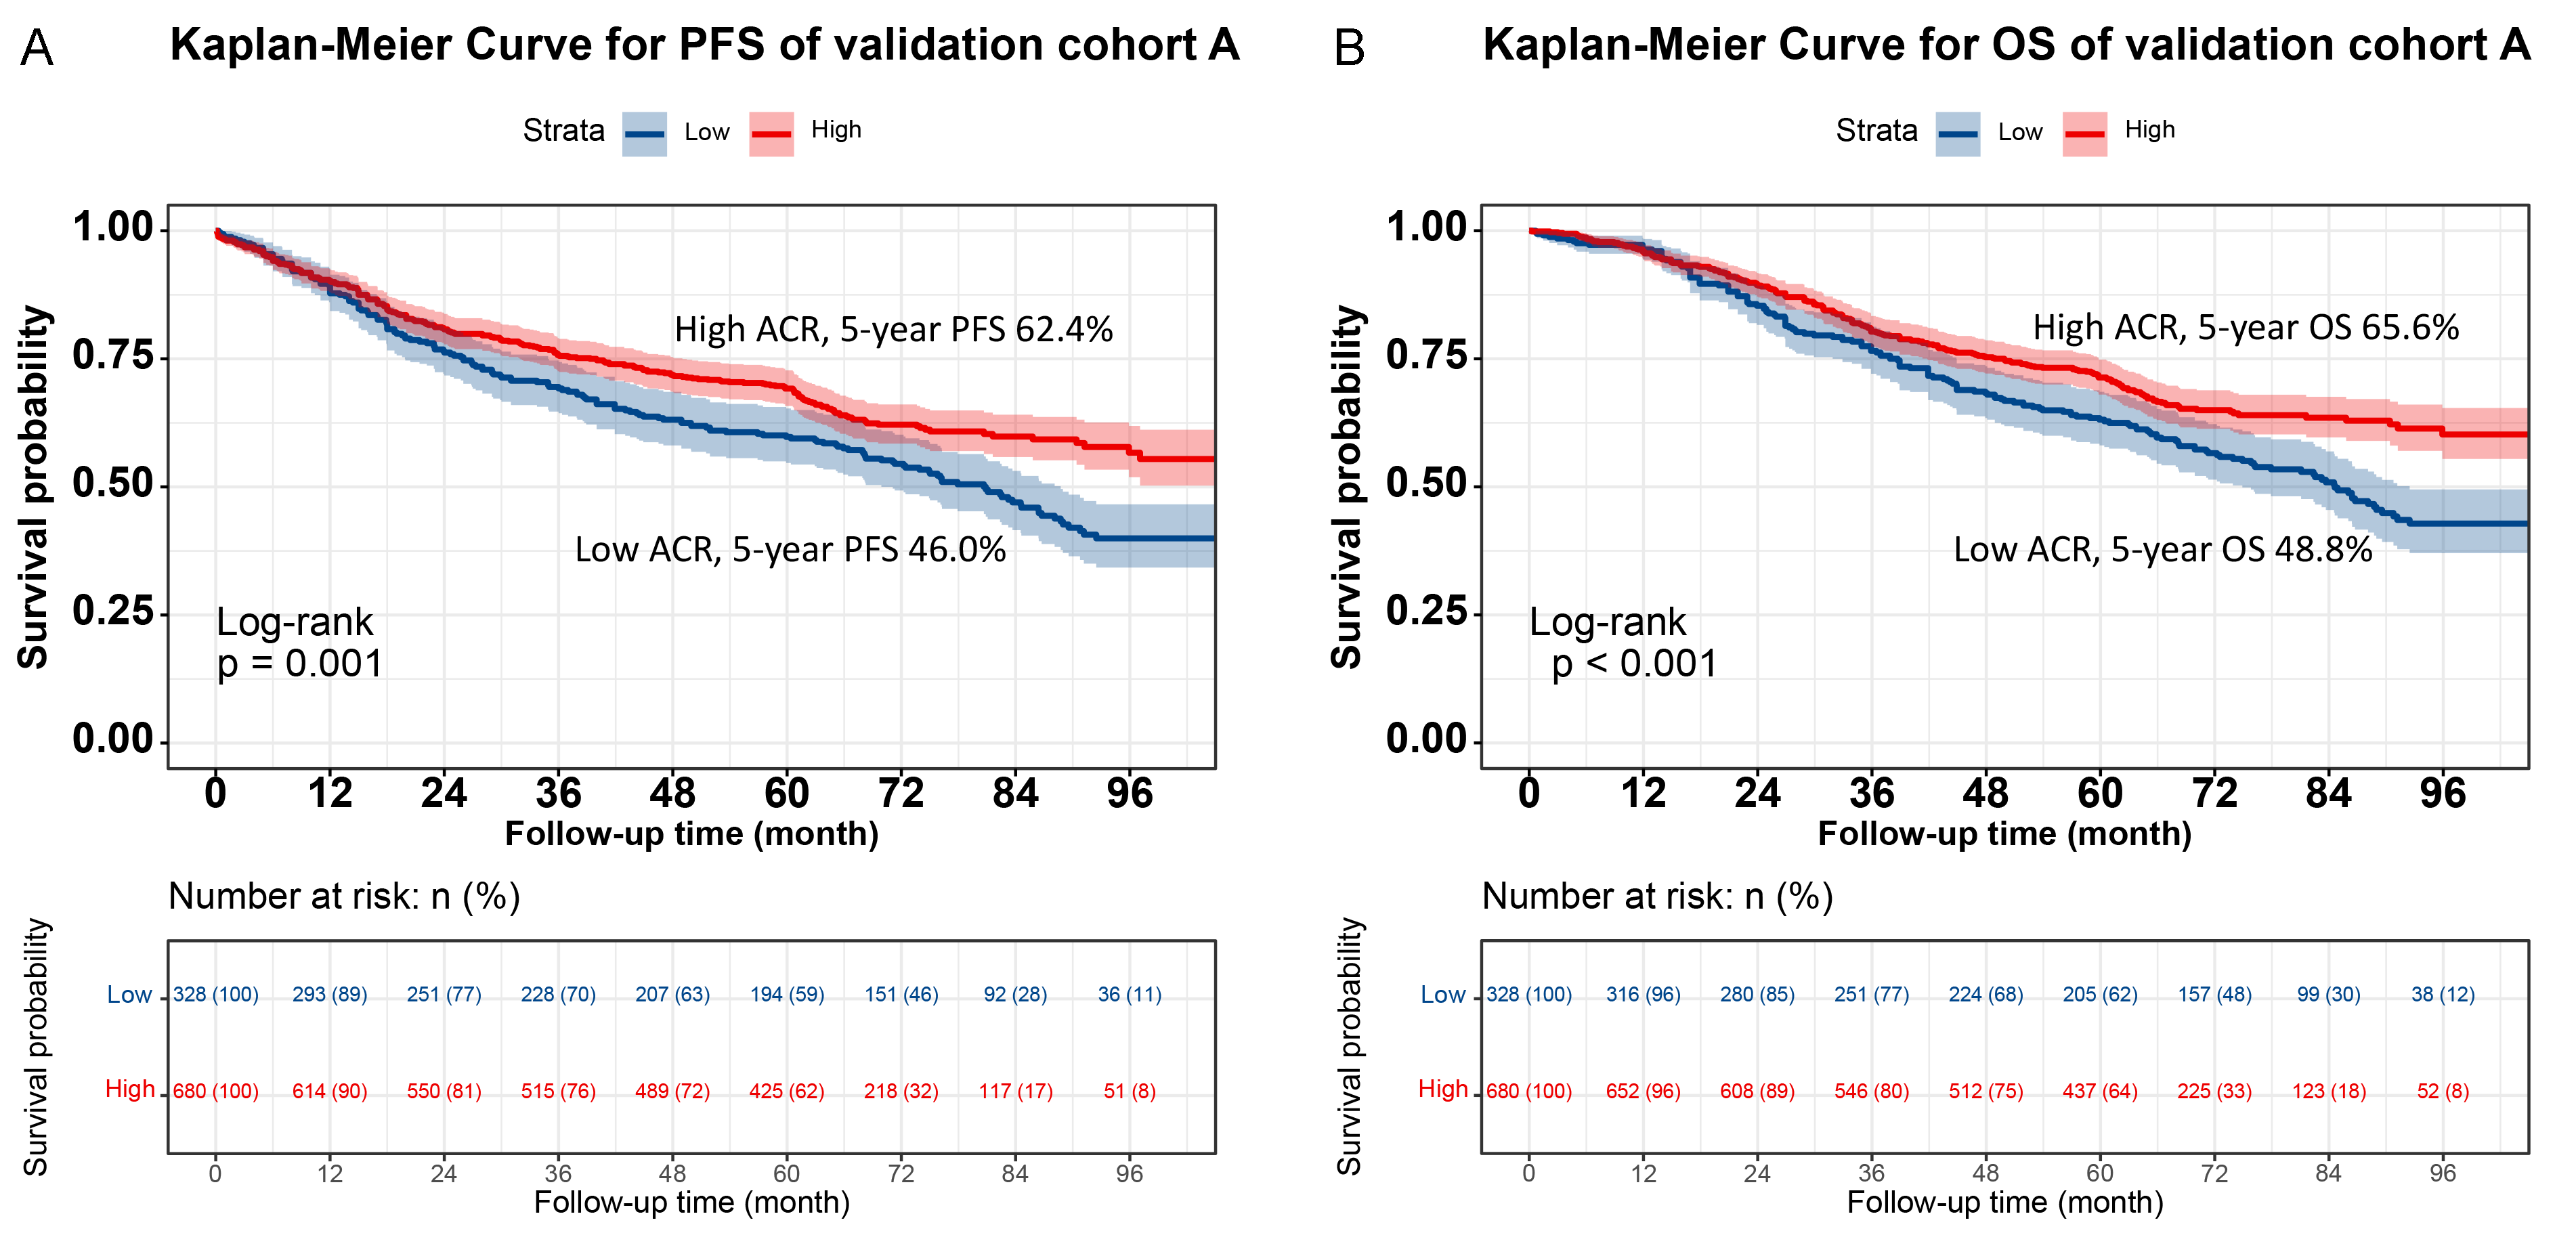
**

**Notes:** A, PFS; B, OS.

**Figure S14** The validation cohort B of Kaplan-Meier curve of ACR.

**
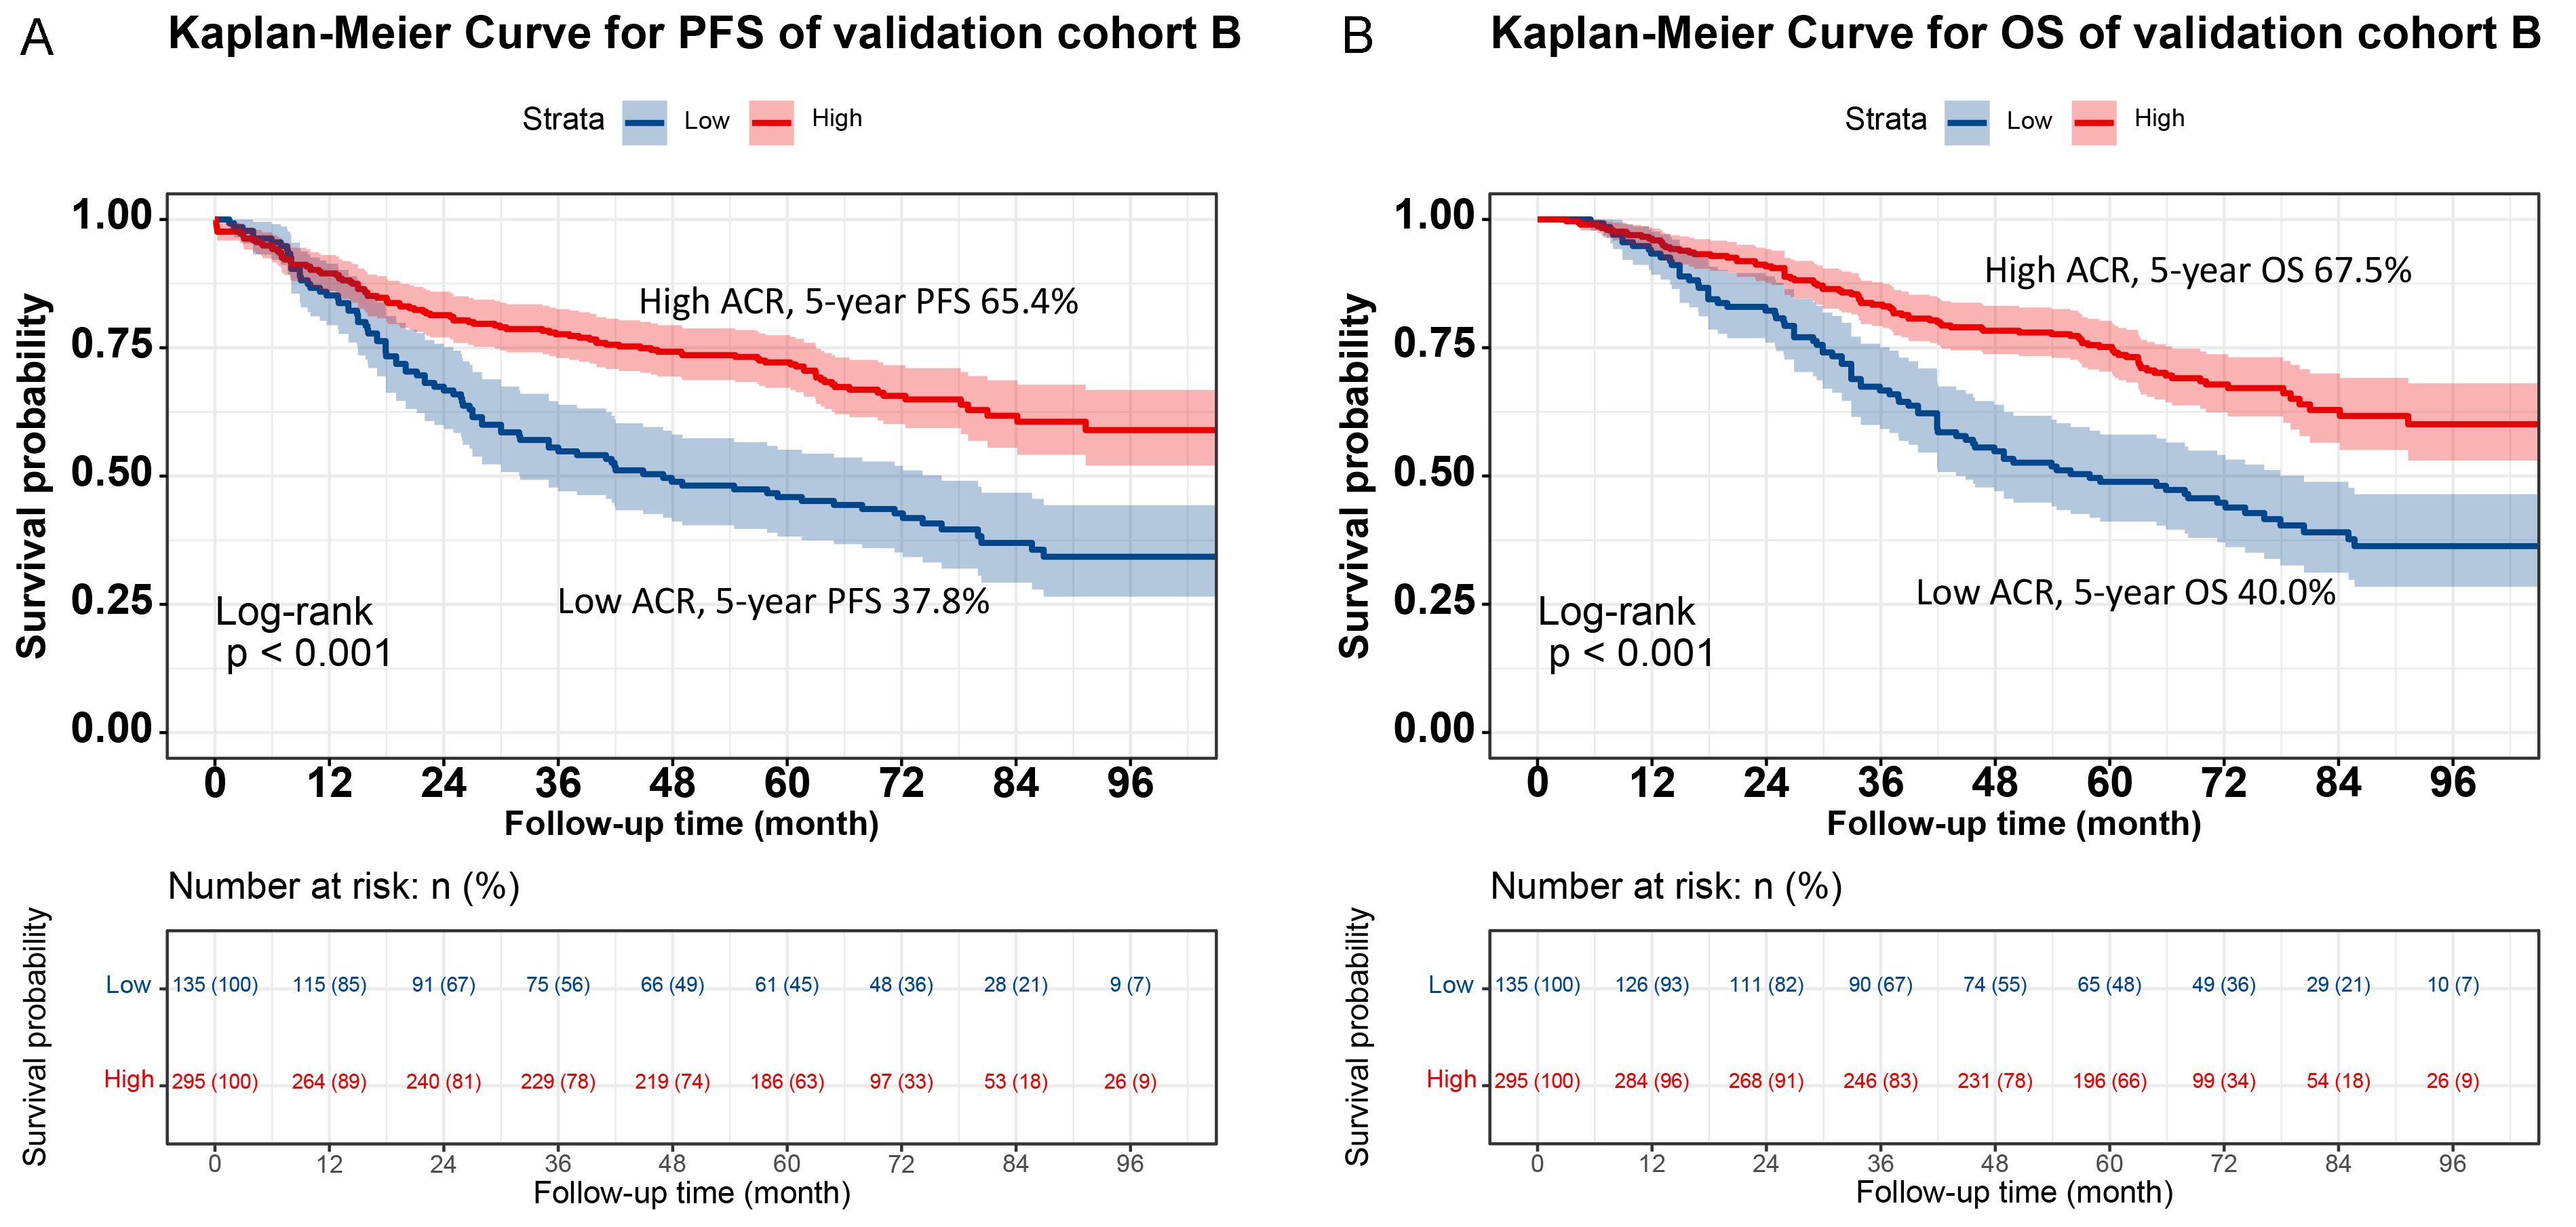
**

**Notes:** A, PFS; B, OS.

**Figure S15. The ROC of Internal validation cohorts.**

**
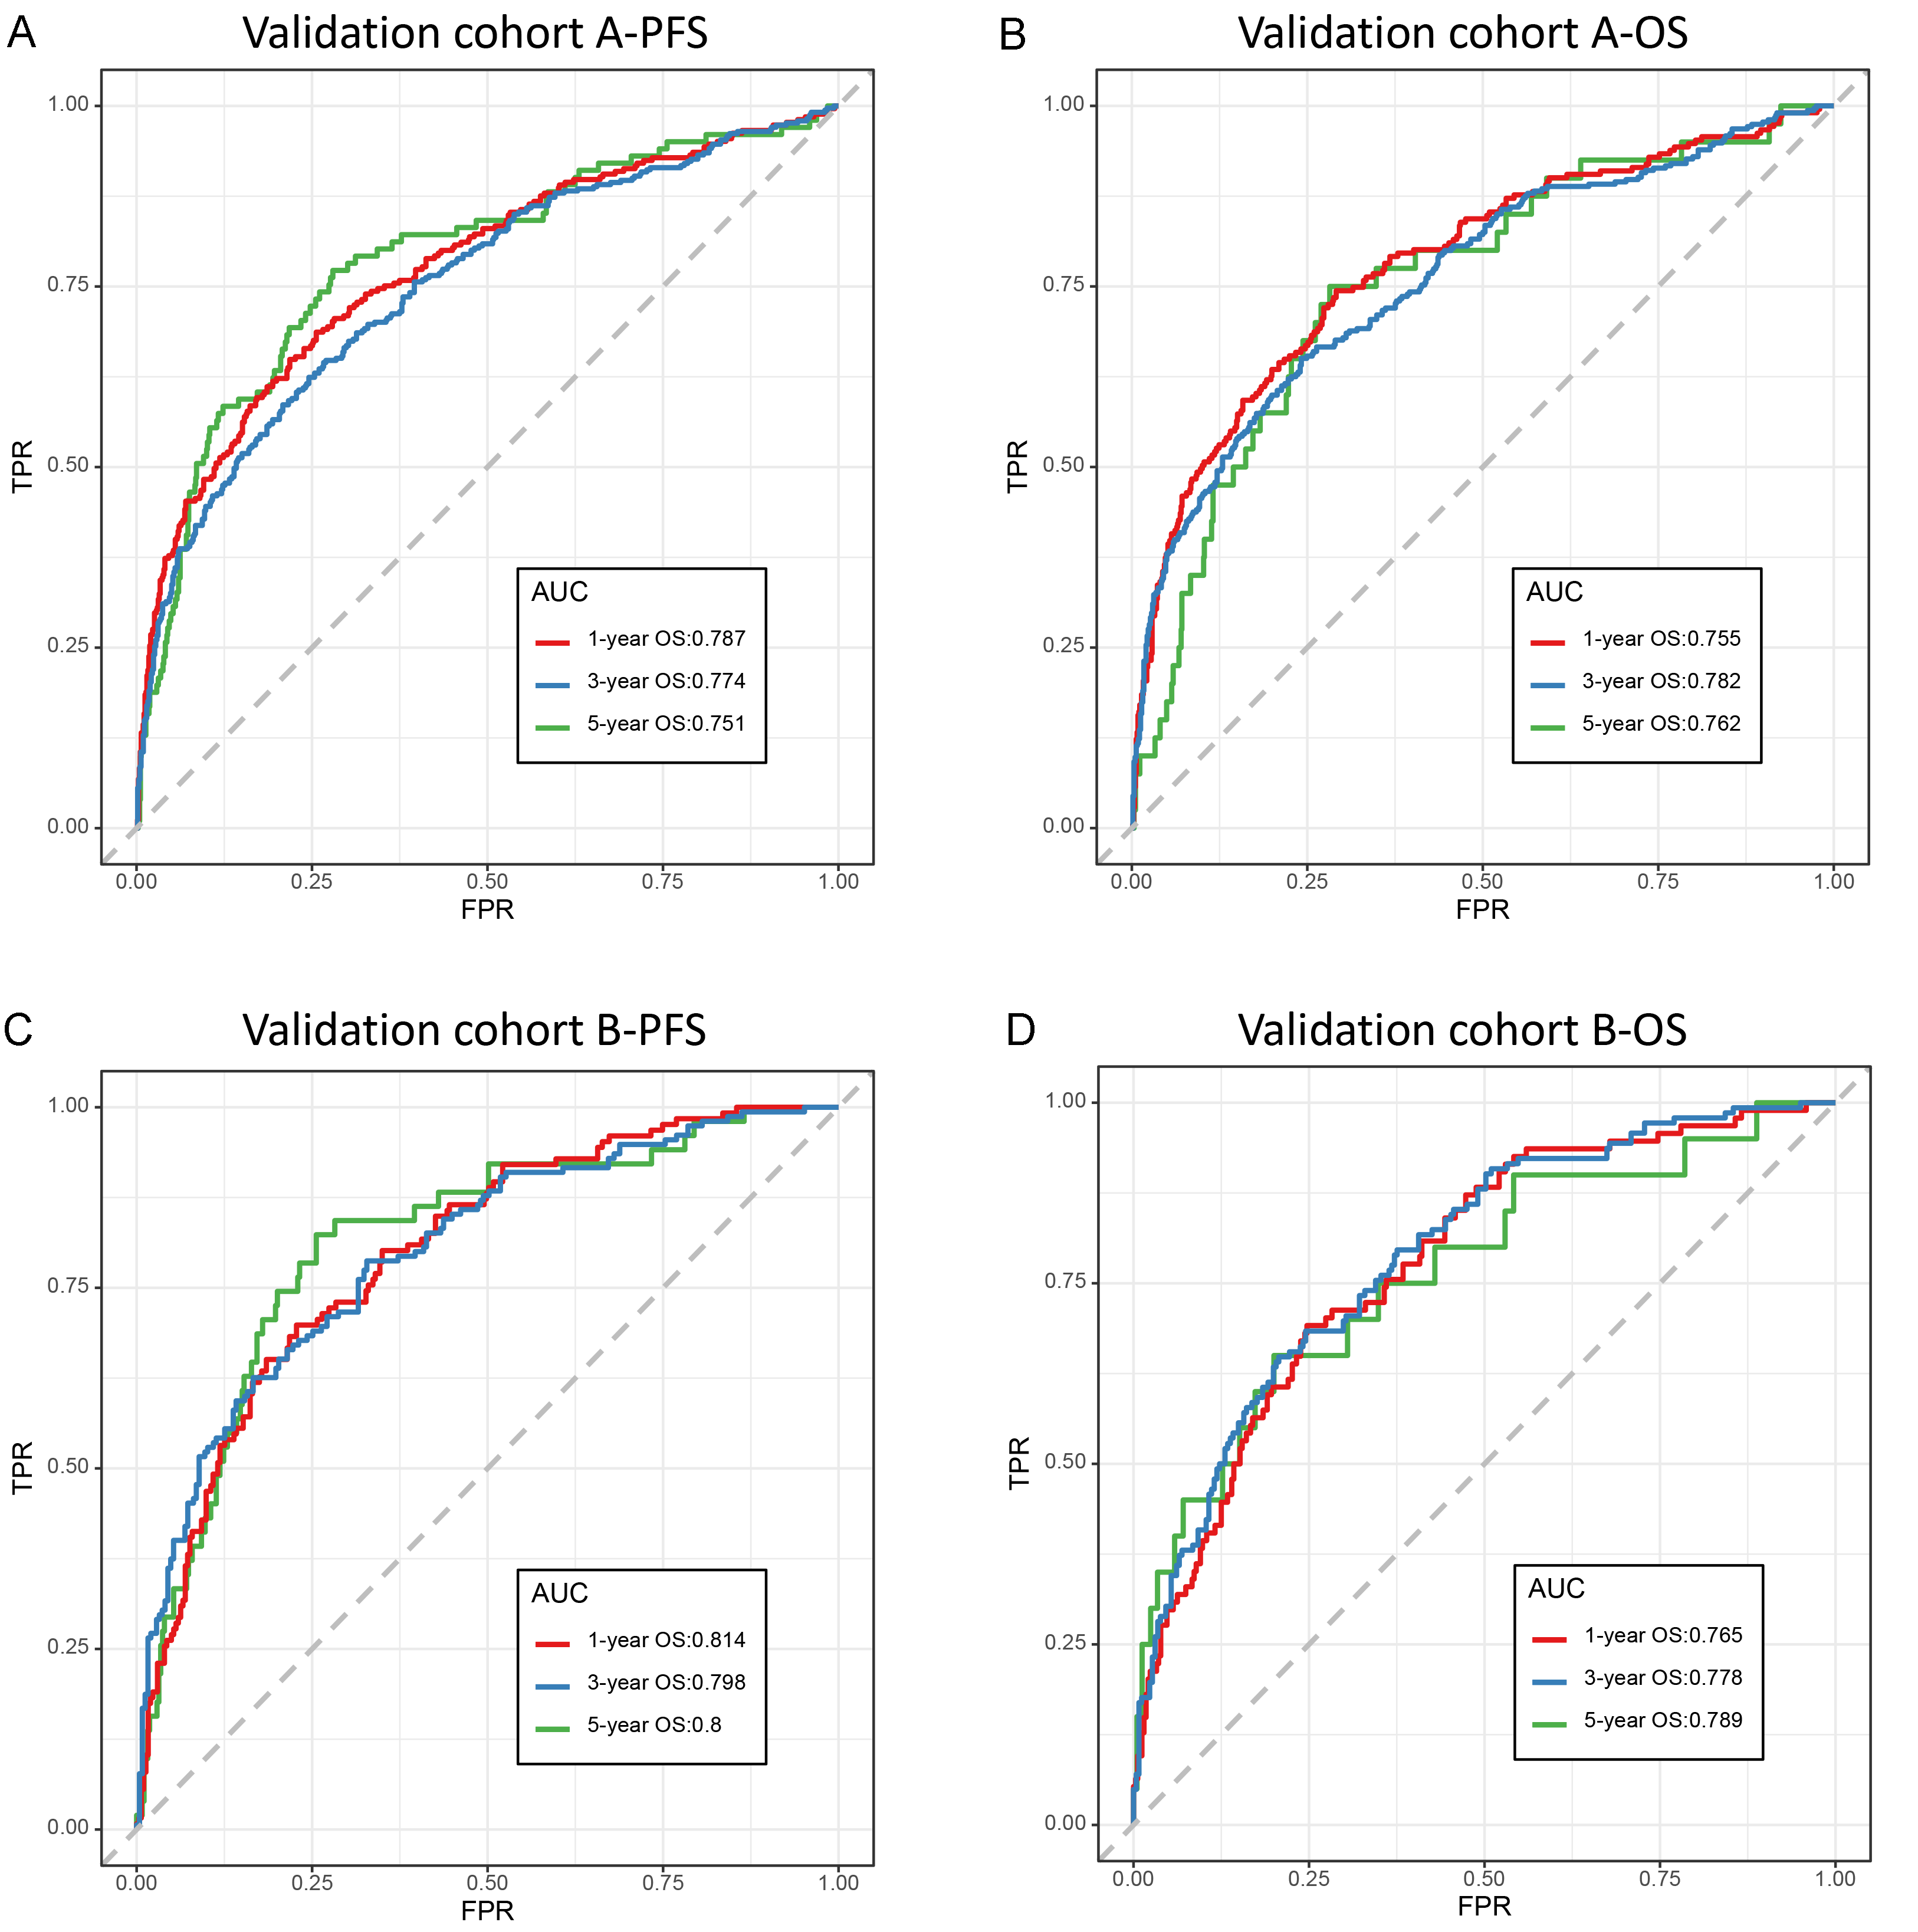
**

**Notes:** A, validation cohrt A-PFS; B, validation cohrt A-OS; C, validation cohrt B-PFS; D, validation cohrt B-OS.

**Figure S16.** Calibration curve at validation cohorts.


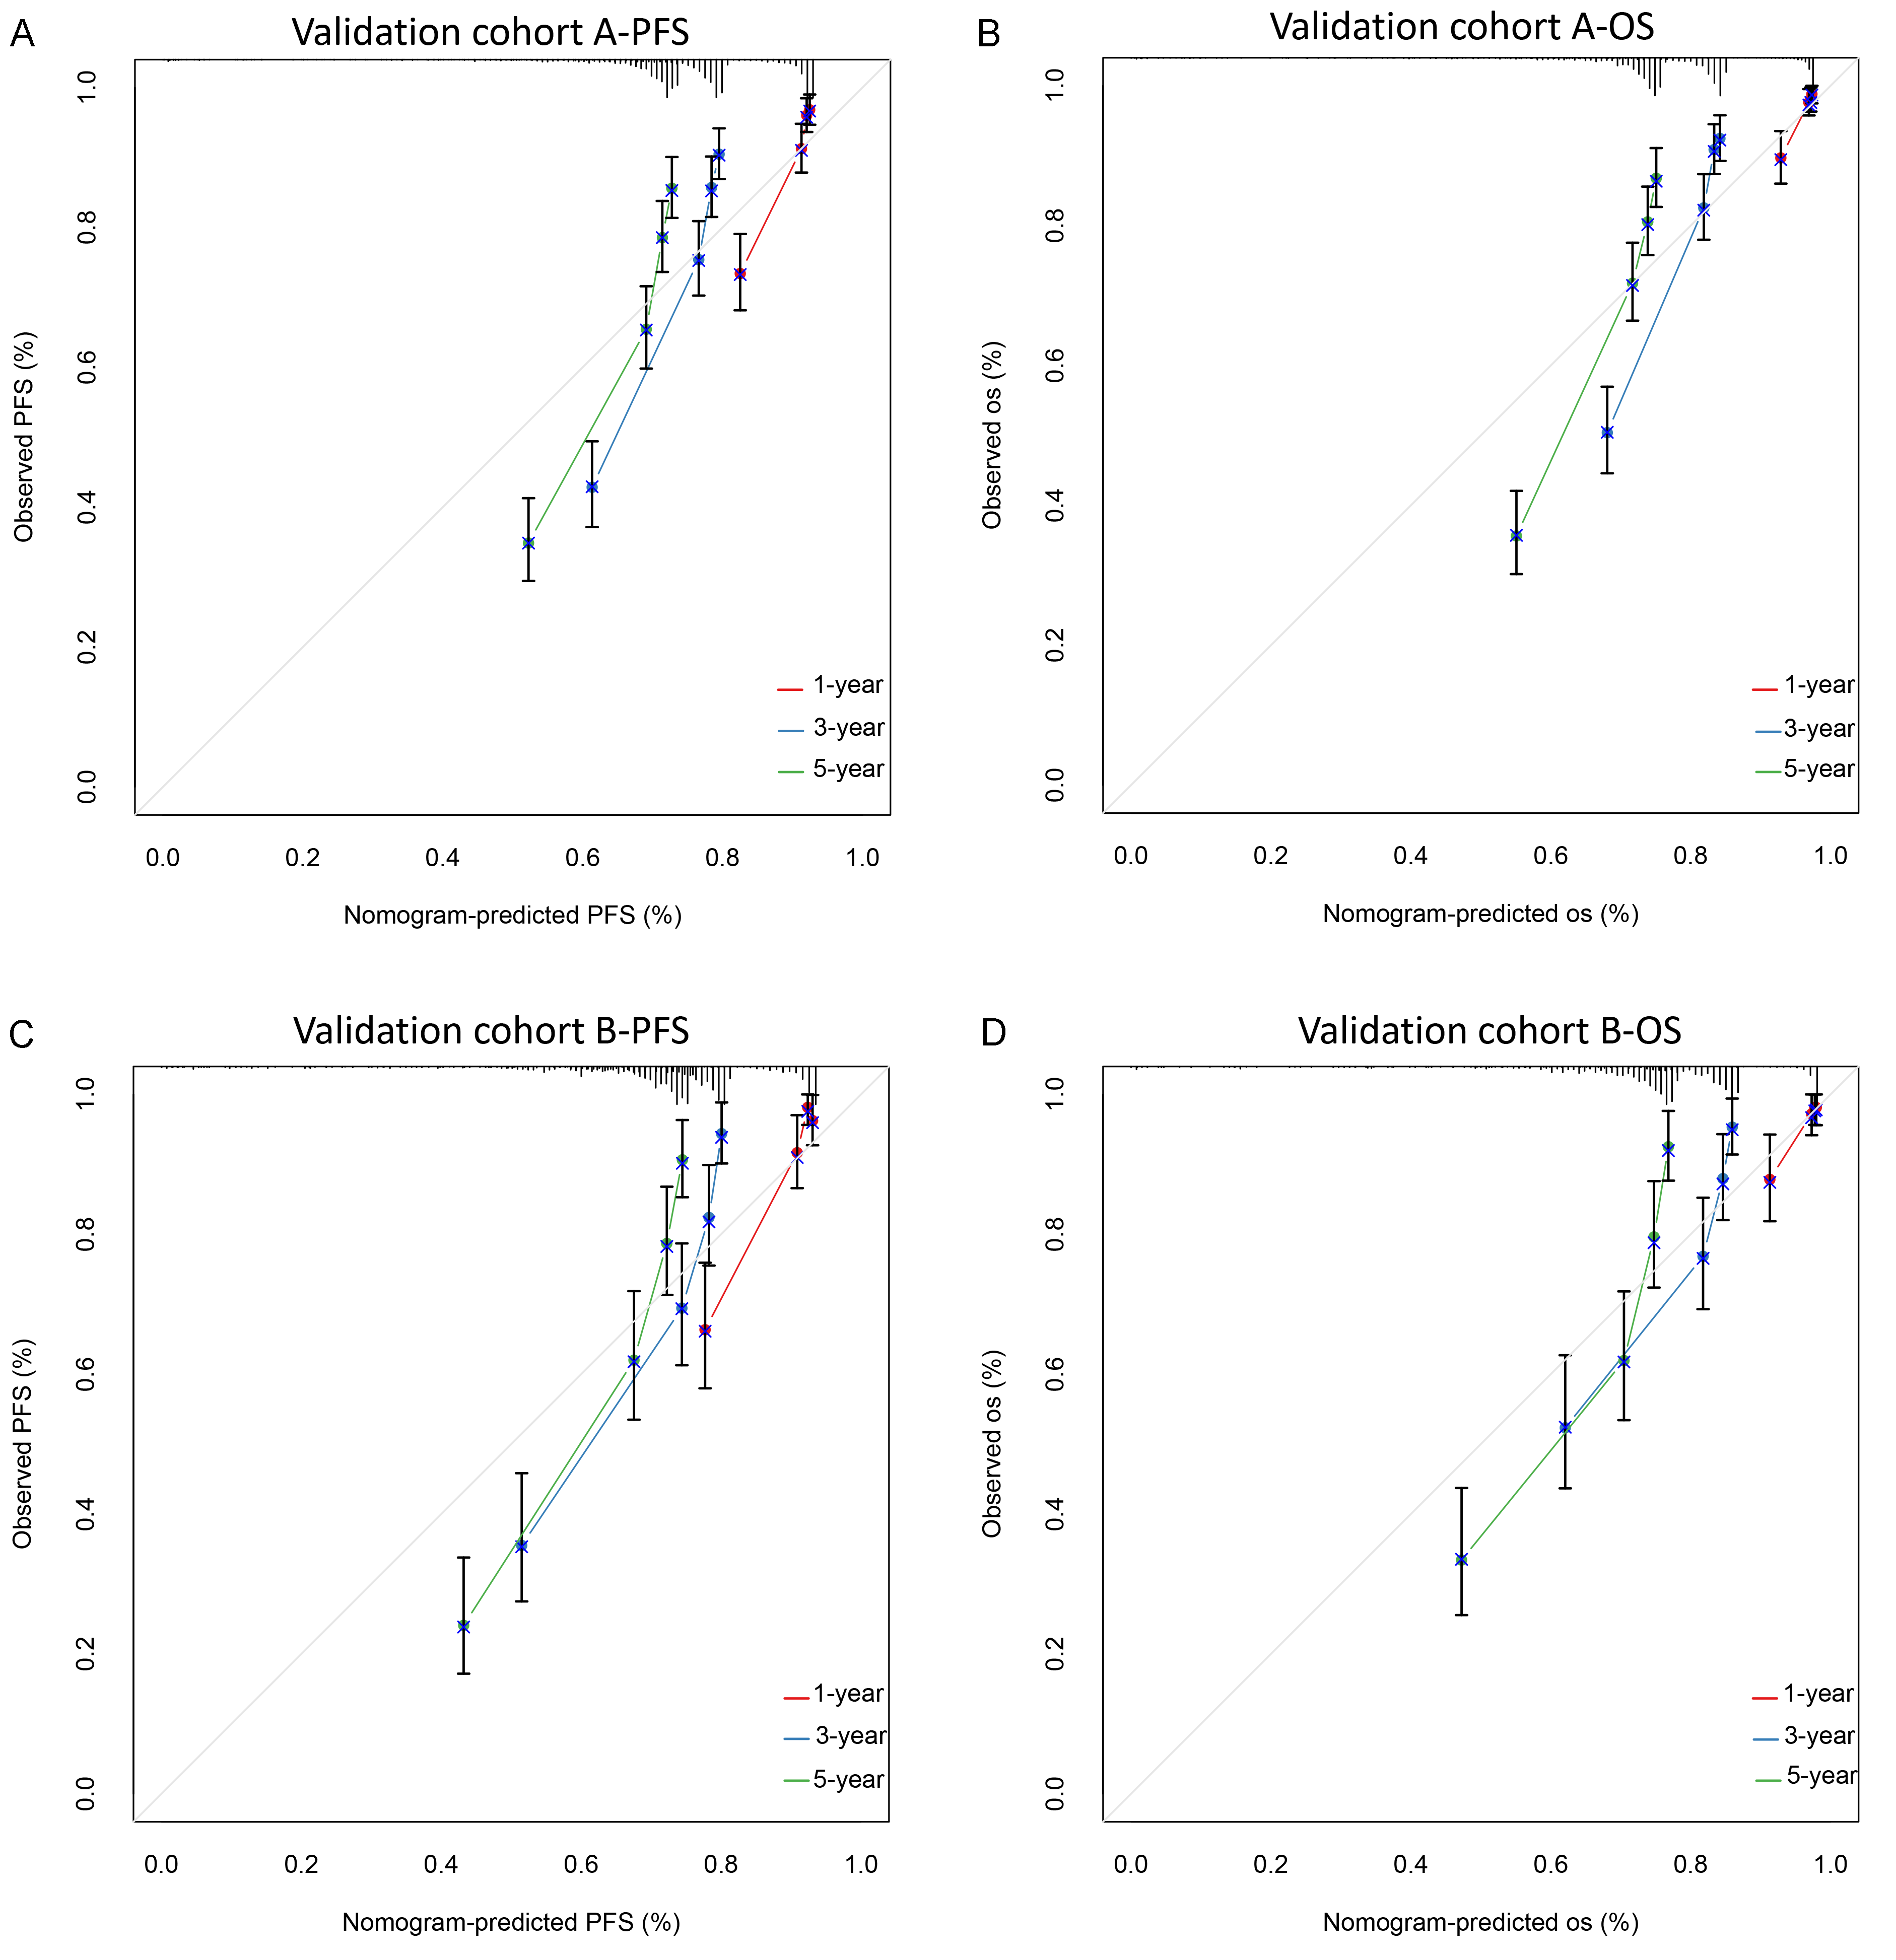


**Notes:** A, validation cohrt A-PFS; B, validation cohrt A-OS; C, validation cohrt B-PFS; D, validation cohrt B-OS.

**Figure S17.** DCA**-5-year** curve at validation cohorts.


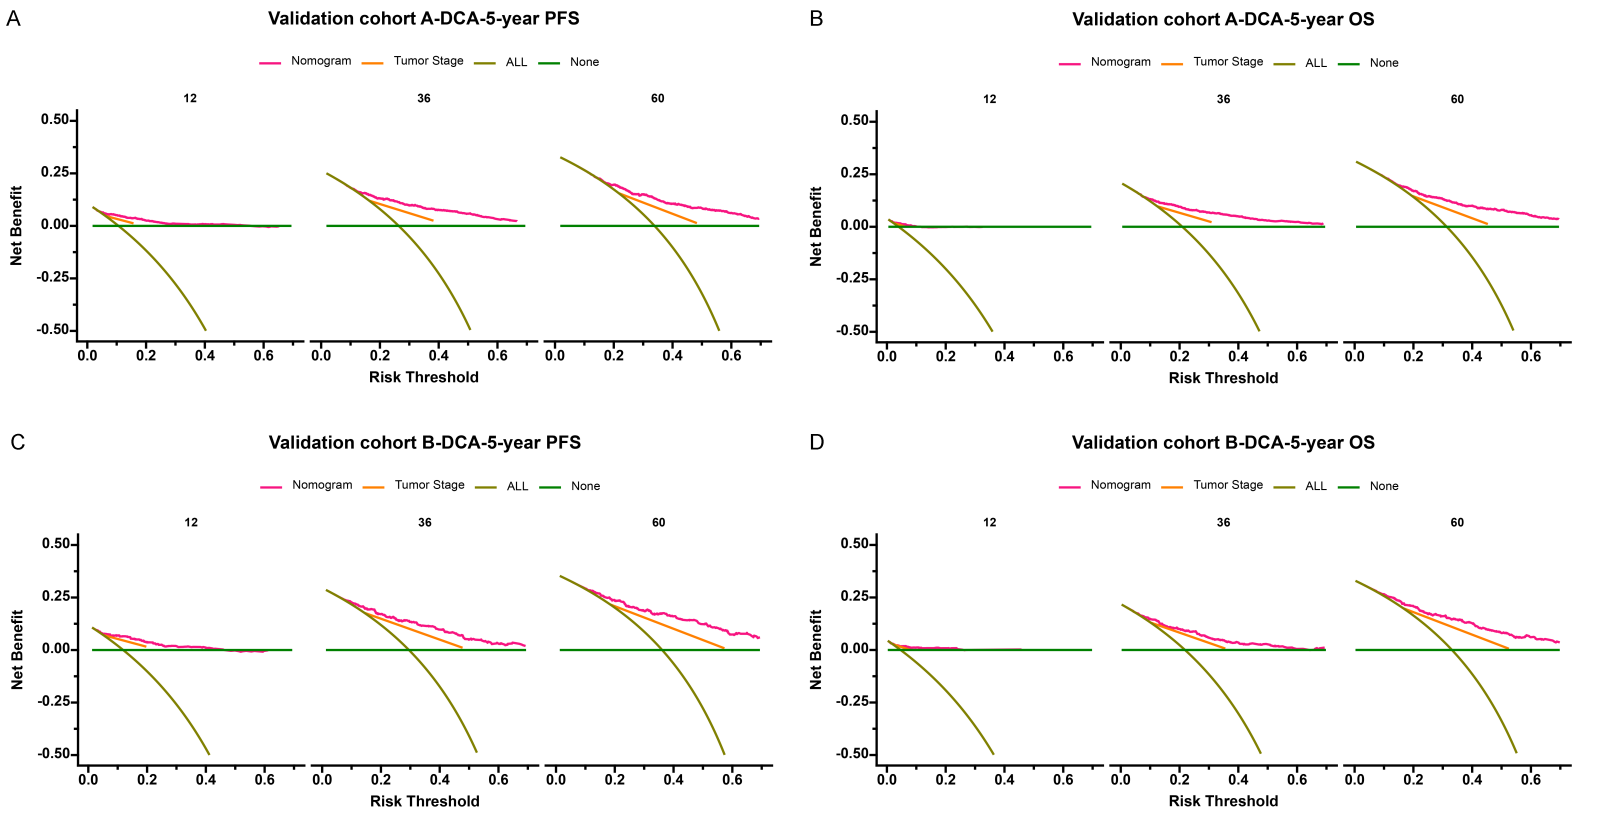


**Notes:** A, validation cohrt A-PFS; B, validation cohrt A-OS; C, validation cohrt B-PFS; D, validation cohrt B-OS.

**Figure S18.** Kaplan-Meier curve of low and high score of nomograms at validation cohorts.

**
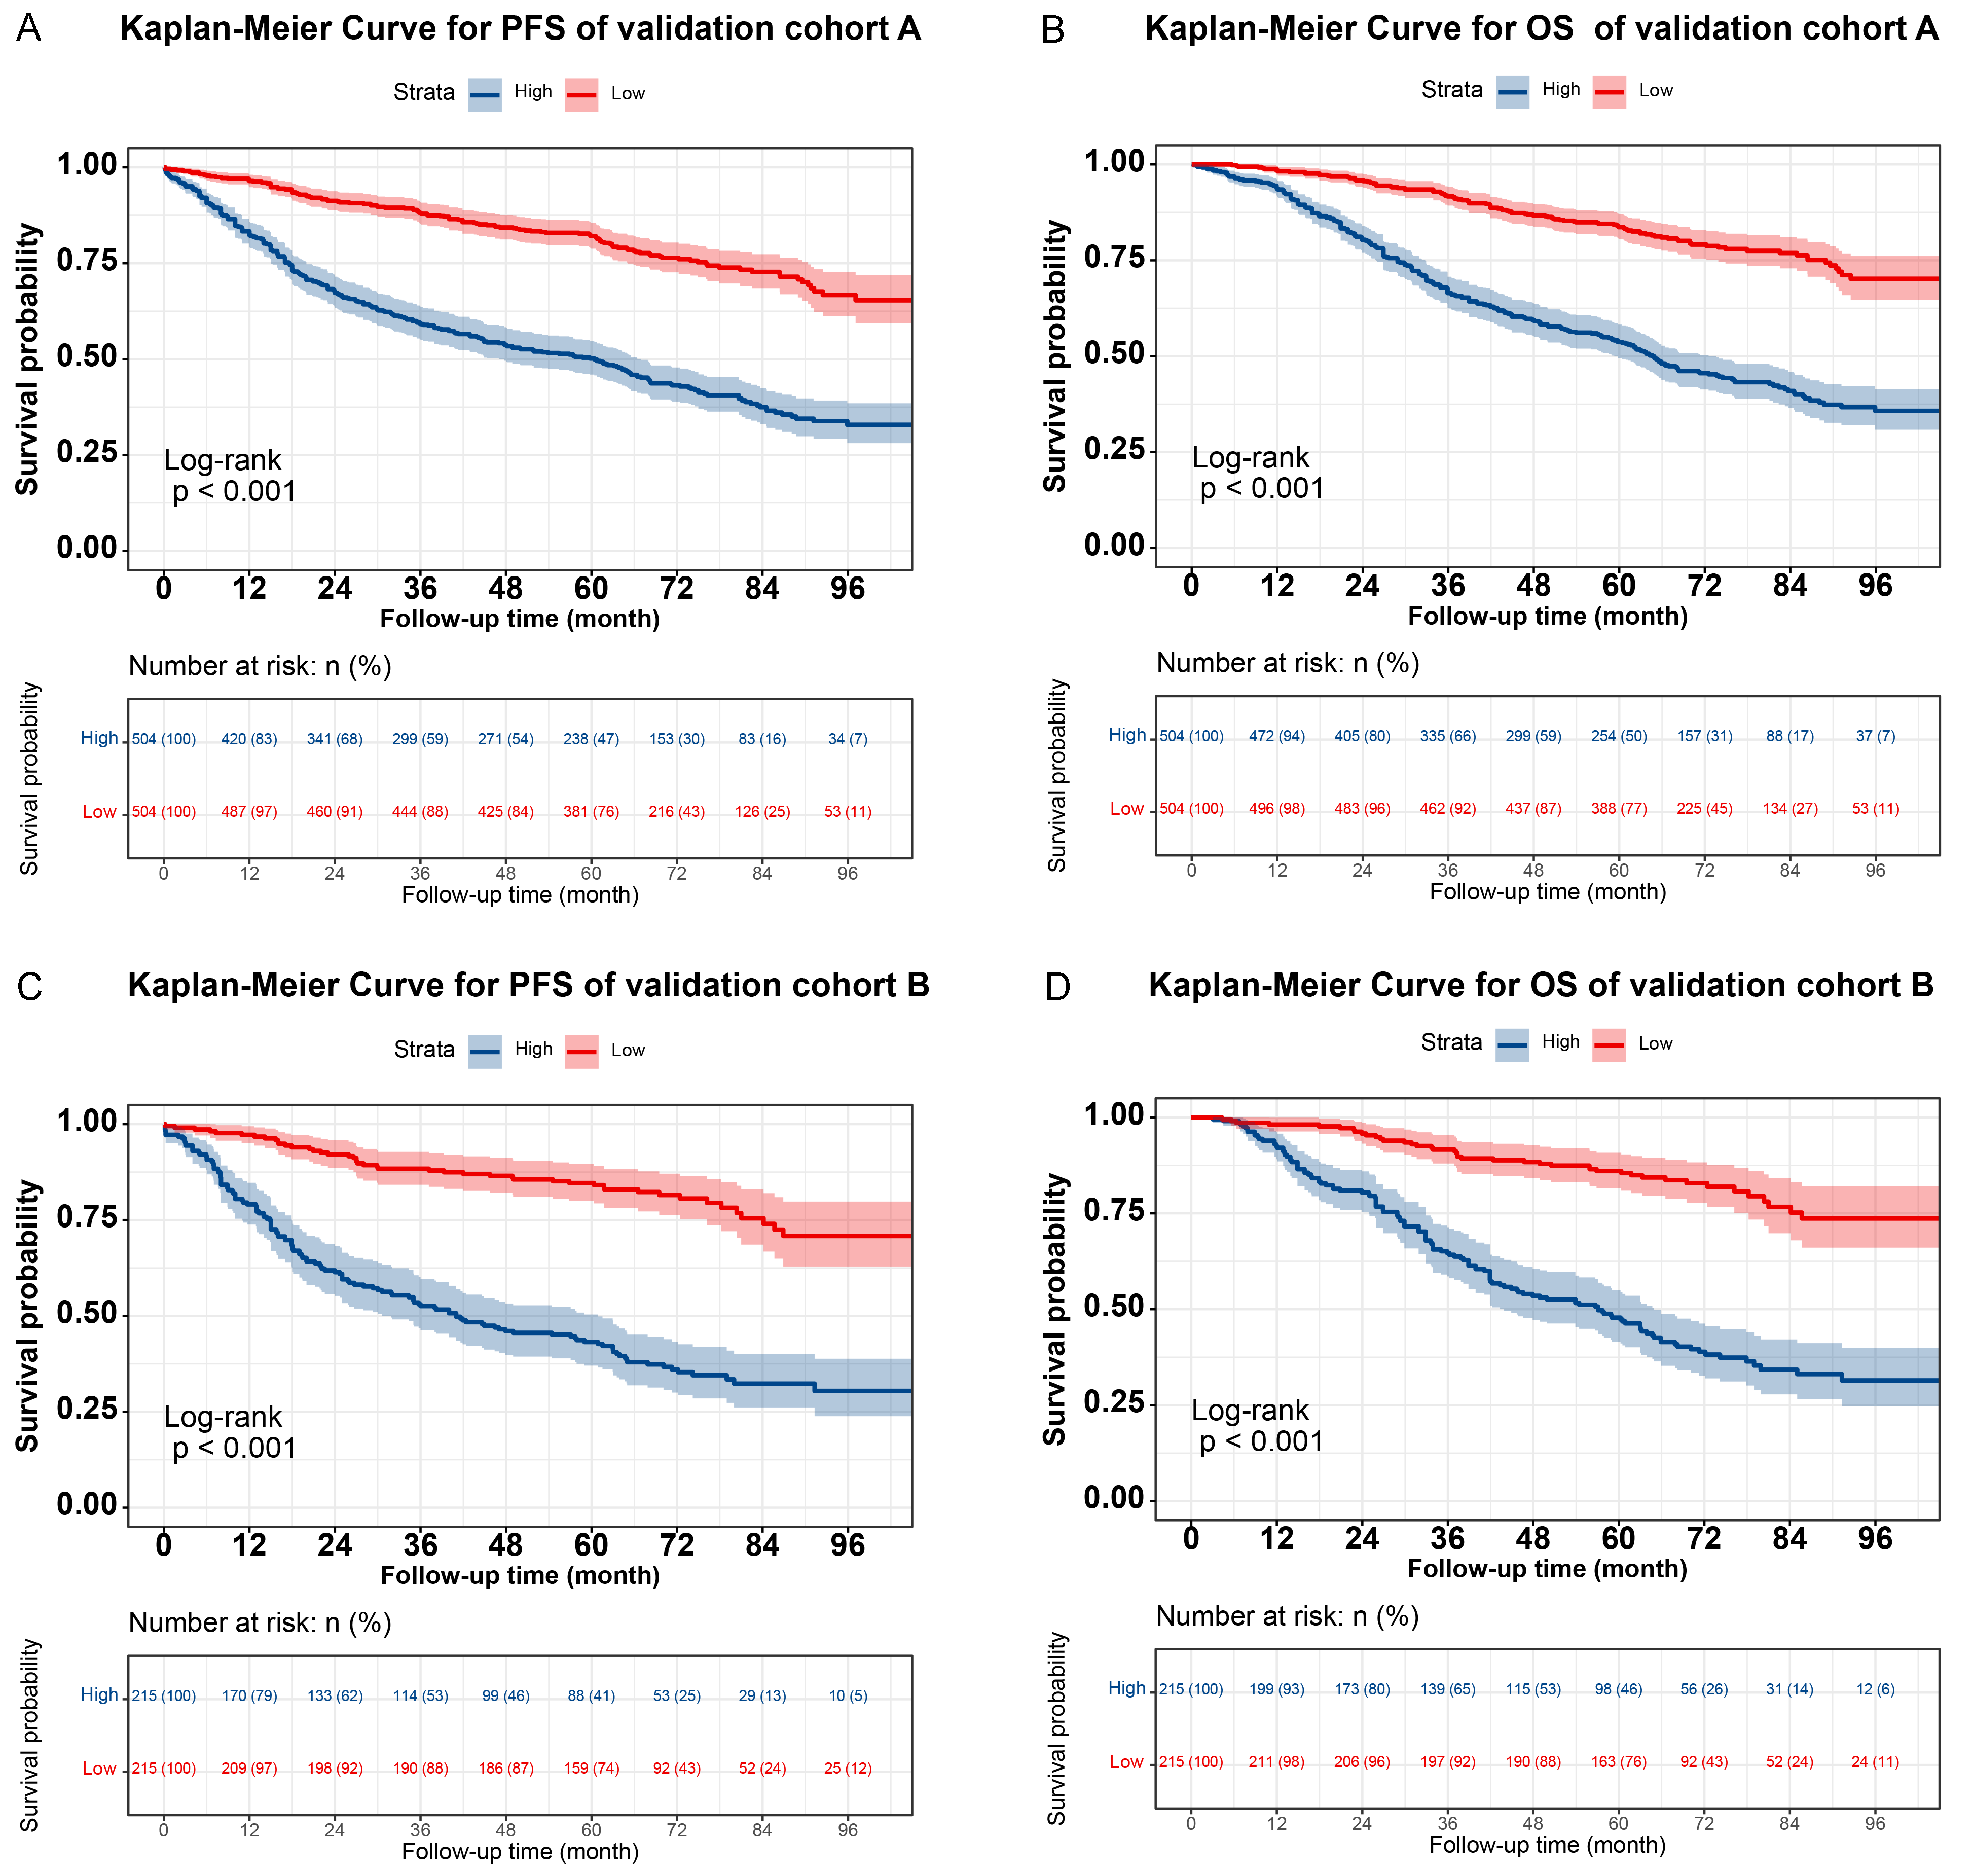
**

**Notes:** A, validation cohrt A-PFS; B, validation cohrt A-OS; C, validation cohrt B-PFS; D, validation cohrt B-OS.

**Table 1.** Association between ACR and PFS of patients with colorectal cancer.

| ACR | Model a | p value | Model b | p value | Model c | p value |
| --- | --- | --- | --- | --- | --- | --- |
| Continuous (per SD) | 0.88 (0.81,0.955) | 0.002 | 0.875 (0.801,0.956) | 0.003 | 0.860(0.785,0.942) | 0.001 |
| Cutoff value (High) | 0.637 (0.543,0.747) | <0.001 | 0.665 (0.562,0.789) | <0.001 | 0.635(0.532,0.758) | <0.001 |
| Quartiles |  |  |  |  |  |  |
| Q1 (~36.55) | ref |  | ref |  | ref |  |
| Q2 (36.55~44.56) | 0.705 (0.571,0.87) | 0.001 | 0.656 (0.529,0.813) | <0.001 | 0.617(0.494,0.771) | <0.001 |
| Q3 (44.56~53.57) | 0.57 (0.455,0.713) | <0.001 | 0.597 (0.473,0.755) | <0.001 | 0.556(0.435,0.709) | <0.001 |
| Q4 (53.57~) | 0.744 (0.599,0.924) | 0.008 | 0.712 (0.565,0.898) | 0.004 | 0.652(0.512,0.831) | 0.001 |
| p for trend |  | 0.001 |  | 0.002 |  | 0.001 |

Notes:

Model a: No adjusted.

Model b: Adjusted for age, sex, BMI, TNM stage.

Model c: Adjusted for age, sex, BMI, TNM stage, tumor type, surgery, radiotherapy, chemotherapy, hypertension, diabetes, smoking, drinking, family history.

**Table 2.** Association between ACR and OS of patients with colorectal cancer.

| ACR | Model a | p value | Model b | p value | Model c | p value |
| --- | --- | --- | --- | --- | --- | --- |
| Continuous (per SD) | 0.849 (0.78,0.925) | <0.001 | 0.835(0.761,0.915) | <0.001 | 0.822(0.747,0.904) | <0.001 |
| Cutoff value (High) | 0.618 (0.524,0.729) | <0.001 | 0.634(0.532,0.755) | <0.001 | 0.615(0.512,0.738) | <0.001 |
| Quartiles |  |  |  |  |  |  |
| Q1 (~36.55) | ref |  | ref |  | ref |  |
| Q2 (36.55~44.56) | 0.689 (0.555,0.855) | 0.001 | 0.632(0.507,0.788) | <0.001 | 0.605(0.481,0.761) | <0.001 |
| Q3 (44.56~53.57) | 0.557 (0.442,0.702) | <0.001 | 0.575(0.453,0.732) | <0.001 | 0.555(0.433,0.713) | <0.001 |
| Q4 (53.57~) | 0.687 (0.548,0.862) | 0.001 | 0.635(0.499,0.807) | <0.001 | 0.591(0.459,0.762) | <0.001 |
| p for trend |  | <0.001 |  | <0.001 |  | <0.001 |

Notes:

Model a: No adjusted.

Model b: Adjusted for gender, age, and BMI.

Model c: Adjusted for gender, age, BMI, hypertension, diabetes, T stage, N stage, tumor size, perineural invasion, vascular invasion, macroscopic type, differentiation, radiotherapy, chemotherapy.

**Table 3.** Association between ACR and recurrence of patients with colorectal cancer.

| IBI | Model a | p value | Model b | p value | Model c | p value |
| --- | --- | --- | --- | --- | --- | --- |
| Continuous (per SD) | 0.892 (0.796,0.999) | 0.047 | 0.862 (0.756,0.984) | 0.027 | 0.850 (0.740,0.980) | 0.023 |
| Cutoff value (High) | 0.66 (0.518,0.84) | <0.001 | 0.618 (0.467,0.82) | <0.001 | 0.588 (0.439,0.787) | <0.001 |
| Quartiles |  |  |  |  |  |  |
| Q1 (~2.59) | ref |  | ref |  | ref |  |
| Q2 (2.59~4.58) | 0.721 (0.524,0.993) | 0.045 | 0.616 (0.431,0.881) | 0.008 | 0.598 (0.415,0.862) | 0.006 |
| Q3 (4.58~8.81) | 0.641 (0.463,0.888) | 0.007 | 0.595 (0.411,0.861) | 0.006 | 0.566 (0.387,0.827) | 0.003 |
| Q4 (8.81~) | 0.688 (0.499,0.949) | 0.023 | 0.564 (0.387,0.824) | 0.003 | 0.547 (0.370,0.809) | 0.003 |
| p for trend |  | 0.034 |  | <0.001 |  | <0.001 |

Notes:

Model a: No adjusted.

Model b: Adjusted for gender, age, and BMI.

Model c: Adjusted for gender, age, BMI, hypertension, diabetes, T stage, N stage, tumor size, perineural invasion, vascular invasion, macroscopic type, differentiation, radiotherapy, chemotherapy.

**Table 4.** Association between ACR and sarcopenia of patients with colorectal cancer.

| IBI | Model a | p value | Model b | p value | Model c | p value |
| --- | --- | --- | --- | --- | --- | --- |
| Continuous (per SD) | 0.7 (0.609,0.806) | <0.001 | 0.773 (0.666,0.897) | <0.001 | 0.760 (0.650,0.880) | <0.001 |
| Cutoff value (High) | 0.54 (0.412,0.708) | <0.001 | 0.681 (0.508,0.913) | 0.010 | 0.674 (0.496,0.917) | 0.012 |
| Quartiles |  |  |  |  |  |  |
| Q1 (~2.59) | ref |  | ref |  | ref |  |
| Q2 (2.59~4.58) | 0.74 (0.525,1.043) | 0.086 | 0.861 (0.601,1.233) | 0.414 | 0.853 (0.588,1.239) | 0.405 |
| Q3 (4.58~8.81) | 0.429 (0.293,0.627) | <0.001 | 0.531 (0.357,0.792) | 0.002 | 0.528 (0.350,0.797) | 0.002 |
| Q4 (8.81~) | 0.407 (0.277,0.598) | <0.001 | 0.538 (0.355,0.815) | 0.003 | 0.524 (0.339,0.810) | 0.004 |
| p for trend |  | <0.001 |  | <0.001 |  | <0.001 |

Notes:

Model a: No adjusted.

Model b: Adjusted for gender, age, and BMI.

Model c: Adjusted for gender, age, BMI, hypertension, diabetes, T stage, N stage, tumor size, perineural invasion, vascular invasion, macroscopic type, differentiation, radiotherapy, chemotherapy.

**Table S1.** Clinicopathological characteristics of patients with colorectal cancer.

| Clinicopathological characteristics | Overall | Low ACR | High ACR | p |
| --- | --- | --- | --- | --- |
| n=1438 | n=902 | n=536 |
| Sex (Man) | 902 (62.7) | 347 (74.9) | 555 (56.9) | <0.001 |
| Age (mean (SD)) | 58.14 (13.13) | 64.45 (11.68) | 55.14 (12.72) | <0.001 |
| BMI (median [IQR]) | 22.04 [19.95, 24.34] | 21.78 [19.61, 24.22] | 22.15 [20.07, 24.45] | 0.076 |
| Hypertension (Yes) | 241 (16.8) | 112 (24.2) | 129 (13.2) | <0.001 |
| Diabetes (Yes) | 90 ( 6.3) | 42 ( 9.1) | 48 ( 4.9) | 0.004 |
| T stage (T3-4) | 1070 (74.4) | 354 (76.5) | 716 (73.4) | 0.245 |
| N stage |  |  |  | 0.129 |
| N0 | 807 (56.1) | 266 (57.5) | 541 (55.5) |  |
| N1 | 398 (27.7) | 135 (29.2) | 263 (27.0) |  |
| N2 | 233 (16.2) | 62 (13.4) | 171 (17.5) |  |
| M stage | 135 ( 9.4) | 55 (11.9) | 80 ( 8.2) | 0.033 |
| TNM stage (III-IV) | 675 (46.9) | 217 (46.9) | 458 (47.0) | 0.999 |
| Perineural invasion (Yes) | 149 (10.4) | 44 ( 9.5) | 105 (10.8) | 0.52 |
| Vascular invasion (Yes) | 246 (17.1) | 64 (13.8) | 182 (18.7) | 0.028 |
| Differentiation (Poor) | 190 (13.2) | 51 (11.0) | 139 (14.3) | 0.107 |
| Location (Rectal cancer) | 734 (51.0) | 210 (45.4) | 524 (53.7) | 0.004 |
| Tumor size (median [IQR]) | 4.79 (2.08) | 5.41 (2.29) | 4.50 (1.91) | <0.001 |
| CEA (median [IQR]) | 3.84 [2.05, 10.66] | 4.29 [2.42, 13.02] | 3.52 [1.89, 9.56] | <0.001 |
| Radiotherapy (%) | 134 ( 9.3) | 26 ( 5.6) | 108 (11.1) | 0.001 |
| Chemotherapy (%) | 655 (45.5) | 206 (44.5) | 449 (46.1) | 0.619 |
| Death (Yes) | 579 (40.3) | 249 (53.8) | 330 (33.8) | <0.001 |
| Recurrence (Yes) | 398 (27.7) | 155 (33.5) | 243 (24.9) | 0.001 |
| Length of stay (median [IQR]) | 17.00 [11.00, 21.00] | 19.00 [16.00, 23.00] | 15.00 [10.00, 20.00] | <0.001 |
| Hospitalization cost (median [IQR]) | 49518.29 [44562.78, 55949.11] | 51230.00 [45192.65, 58189.70] | 48741.23 [44471.74, 55193.46] | <0.001 |

Table Note: CRC, colorectal cancer; BMI, body mass index.

**Table S2**. Univariate and multivariate Cox regression analysis of clinicopathological characteristics associated with PFS in CRC patients.

| Characteristic | Progression-free survival | | | |
| --- | --- | --- | --- | --- |
| Univariate analysis | | Multivariate analysis | |
| HR (95%CI) | P value | HR (95%CI) | P value |
| Age | 1.286 (1.098-1.507) | 0.002 | 1.175 (0.992 - 1.392) | 0.062 |
| T stage | 2.354 (1.888-2.935) | <0.001 | 1.461 (1.155 - 1.849) | 0.002 |
| N stage |  | <0.001 |  | <0.001 |
| N0 | Ref. |  | Ref. |  |
| N1 | 1.877 (1.557-2.264) | <0.001 | 1.531 (1.262 - 1.857) | <0.001 |
| N2 | 4.036 (3.319-4.907) | <0.001 | 2.874 (2.322 - 3.559) | <0.001 |
| M stage | 5.348 (4.376-6.536) | <0.001 | 3.274 (2.652 - 4.041) | <0.001 |
| Perineural invasion (Yes) | 1.763 (1.409-2.205) | <0.001 | 1.104 (0.86 - 1.416) | 0.438 |
| Vascular invasion (Yes) | 1.994 (1.66-2.395) | <0.001 | 1.277 (1.034 - 1.576) | 0.023 |
| Differentiation (high/medium) | 0.697 (0.561-0.865) | 0.001 | 0.829 (0.662 - 1.037) | 0.101 |
| Tumor size (≥5cm) | 1.184 (1.011-1.386) | 0.036 | 0.906 (0.767 - 1.07) | 0.245 |
| CEA (≥5ng/ml) | 1.976 (1.687-2.314) | <0.001 | 1.502 (1.27 - 1.777) | <0.001 |
| ACR (High) | 0.637 (0.543-0.747) | <0.001 | 0.655 (0.551 - 0.779) | <0.001 |

Table Note: CRC, colorectal cancer.

**Table S3.** Univariate and multivariate Cox regression analysis of clinicopathological characteristics associated with OS in CRC patients.

| Characteristic | Overall survival | | | |
| --- | --- | --- | --- | --- |
| Univariate analysis | | Multivariate analysis | |
| HR (95%CI) | P value | HR (95%CI) | P value |
| Age | 1.35 (1.146-1.592) | <0.001 | 1.203 (1.01 - 1.433) | 0.039 |
| T stage | 2.484 (1.966-3.138) | <0.001 | 1.499 (1.169 - 1.921) | 0.001 |
| N stage |  | <0.001 |  | <0.001 |
| N0 | Ref. |  |  |  |
| N1 | 1.882 (1.549-2.285) | <0.001 | 1.528 (1.251 - 1.868) | <0.001 |
| N2 | 4.06 (3.321-4.965) | <0.001 | 2.772 (2.223 - 3.456) | <0.001 |
| M stage | 5.573 (4.547-6.83) | <0.001 | 3.415 (2.759 - 4.227) | <0.001 |
| Perineural invasion (Yes) | 1.722 (1.366-2.171) | <0.001 | 1.052 (0.812 - 1.361) | 0.703 |
| Vascular invasion (Yes) | 2.037 (1.688-2.457) | <0.001 | 1.329 (1.071 - 1.648) | 0.01 |
| Differentiation (high/medium) | 0.645 (0.518-0.803) | <0.001 | 0.752 (0.599 - 0.944) | 0.014 |
| Tumor size (≥5cm) | 1.298 (1.103-1.527) | 0.002 | 1.008 (0.849 - 1.196) | 0.928 |
| CEA (≥5ng/ml) | 2.022 (1.717-2.382) | <0.001 | 1.501 (1.261 - 1.785) | <0.001 |
| ACR (High) | 0.618 (0.524-0.729) | <0.001 | 0.64 (0.535 - 0.764) | <0.001 |

Table Note: CRC, colorectal cancer.

**Table S4.** Clinicopathological characteristics of validation cohorts with colorectal cancer.

| Clinicopathological characteristics | Validation cohort A | Validation cohort B | p |
| --- | --- | --- | --- |
| n=1008 | n=430 |
| Sex (Man) | 640 (63.5) | 262 (60.9) | 0.39 |
| Age (mean (SD)) | 58.30 (13.24) | 57.76 (12.87) | 0.473 |
| BMI (median [IQR]) | 22.06 [19.91, 24.44] | 21.89 [20.00, 24.22] | 0.676 |
| Hypertension (Yes) | 166 (16.5) | 75 (17.4) | 0.707 |
| Diabetes (Yes) | 62 ( 6.2) | 28 ( 6.5) | 0.889 |
| T stage (T3-4) | 738 (73.2) | 332 (77.2) | 0.128 |
| N stage |  |  | 0.697 |
| N0 | 568 (56.3) | 239 (55.6) |  |
| N1 | 282 (28.0) | 116 (27.0) |  |
| N2 | 158 (15.7) | 75 (17.4) |  |
| M stage(M1) | 91 ( 9.0) | 44 (10.2) | 0.536 |
| TNM stage (III-IV) | 475 (47.1) | 200 (46.5) | 0.877 |
| Perineural invasion (Yes) | 107 (10.6) | 42 ( 9.8) | 0.698 |
| Vascular invasion (Yes) | 181 (18.0) | 65 (15.1) | 0.218 |
| Differentiation (Poor) | 132 (13.1) | 58 (13.5) | 0.907 |
| Location (Rectal cancer) | 519 (51.5) | 215 (50.0) | 0.646 |
| Tumor size (median [IQR]) | 4.73 (2.09) | 4.93 (2.06) | 0.087 |
| CEA (median [IQR]) | 3.72 [2.01, 10.48] | 3.96 [2.19, 11.26] | 0.24 |
| Radiotherapy (%) | 102 (10.1) | 32 ( 7.4) | 0.134 |
| Chemotherapy (%) | 452 (44.8) | 203 (47.2) | 0.443 |
| Death (Yes) | 402 (39.9) | 177 (41.2) | 0.693 |
| Length of stay (median [IQR]) | 17.00 [11.00, 21.00] | 17.00 [11.00, 21.00] | 0.97 |
| Hospitalization cost (median [IQR]) | 49280.09 [44561.72, 56137.01] | 49783.96 [44570.43, 55574.77] | 0.862 |

Table Note: CRC, colorectal cancer; BMI, body mass index.
