# Supplementary material for: Serum Albumin-Creatinine Ratio Predicts Sarcopenia and Poor Outcomes in Patients with Colorectal Cancer
Source: Research Square preprint supplement (doi:10.21203/rs.3.rs-7897966/v1), 2025-12-30
Supplement: Supplementary file 2 [file 3851756afb44ffd02ca4c793.docx]

**Table 2.** Association between ACR and OS of patients with colorectal cancer.

| ACR | Model a | p value | Model b | p value | Model c | p value |
| --- | --- | --- | --- | --- | --- | --- |
| Continuous (per SD) | 0.849 (0.78,0.925) | <0.001 | 0.835(0.761,0.915) | <0.001 | 0.822(0.747,0.904) | <0.001 |
| Cutoff value (High) | 0.618 (0.524,0.729) | <0.001 | 0.634(0.532,0.755) | <0.001 | 0.615(0.512,0.738) | <0.001 |
| Quartiles |  |  |  |  |  |  |
| Q1 (~36.55) | ref |  | ref |  | ref |  |
| Q2 (36.55~44.56) | 0.689 (0.555,0.855) | 0.001 | 0.632(0.507,0.788) | <0.001 | 0.605(0.481,0.761) | <0.001 |
| Q3 (44.56~53.57) | 0.557 (0.442,0.702) | <0.001 | 0.575(0.453,0.732) | <0.001 | 0.555(0.433,0.713) | <0.001 |
| Q4 (53.57~) | 0.687 (0.548,0.862) | 0.001 | 0.635(0.499,0.807) | <0.001 | 0.591(0.459,0.762) | <0.001 |
| p for trend |  | <0.001 |  | <0.001 |  | <0.001 |

Notes:

Model a: No adjusted.

Model b: Adjusted for gender, age, and BMI.

Model c: Adjusted for gender, age, BMI, hypertension, diabetes, T stage, N stage, tumor size, perineural invasion, vascular invasion, macroscopic type, differentiation, radiotherapy, chemotherapy.
