# Supplementary material for: Serum Albumin-Creatinine Ratio Predicts Sarcopenia and Poor Outcomes in Patients with Colorectal Cancer
Source: Research Square preprint supplement (doi:10.21203/rs.3.rs-7897966/v1), 2025-12-30
Supplement: Supplementary file 3 [file 8dab2edbf1ab68e487e5ab4e.docx]

**Table 4.** Association between ACR and sarcopenia of patients with colorectal cancer.

| IBI | Model a | p value | Model b | p value | Model c | p value |
| --- | --- | --- | --- | --- | --- | --- |
| Continuous (per SD) | 0.7 (0.609,0.806) | <0.001 | 0.773 (0.666,0.897) | <0.001 | 0.760 (0.650,0.880) | <0.001 |
| Cutoff value (High) | 0.54 (0.412,0.708) | <0.001 | 0.681 (0.508,0.913) | 0.010 | 0.674 (0.496,0.917) | 0.012 |
| Quartiles |  |  |  |  |  |  |
| Q1 (~2.59) | ref |  | ref |  | ref |  |
| Q2 (2.59~4.58) | 0.74 (0.525,1.043) | 0.086 | 0.861 (0.601,1.233) | 0.414 | 0.853 (0.588,1.239) | 0.405 |
| Q3 (4.58~8.81) | 0.429 (0.293,0.627) | <0.001 | 0.531 (0.357,0.792) | 0.002 | 0.528 (0.350,0.797) | 0.002 |
| Q4 (8.81~) | 0.407 (0.277,0.598) | <0.001 | 0.538 (0.355,0.815) | 0.003 | 0.524 (0.339,0.810) | 0.004 |
| p for trend |  | <0.001 |  | <0.001 |  | <0.001 |

Notes:

Model a: No adjusted.

Model b: Adjusted for gender, age, and BMI.

Model c: Adjusted for gender, age, BMI, hypertension, diabetes, T stage, N stage, tumor size, perineural invasion, vascular invasion, macroscopic type, differentiation, radiotherapy, chemotherapy.
