# Supplementary material for: Serum Albumin-Creatinine Ratio Predicts Sarcopenia and Poor Outcomes in Patients with Colorectal Cancer
Source: Research Square preprint supplement (doi:10.21203/rs.3.rs-7897966/v1), 2025-12-30
Supplement: Supplementary file 4 [file 90289e2d10fb8cd00ef98881.docx]

**Table 1.** Association between ACR and PFS of patients with colorectal cancer.

| ACR | Model a | p value | Model b | p value | Model c | p value |
| --- | --- | --- | --- | --- | --- | --- |
| Continuous (per SD) | 0.88 (0.81,0.955) | 0.002 | 0.875 (0.801,0.956) | 0.003 | 0.860(0.785,0.942) | 0.001 |
| Cutoff value (High) | 0.637 (0.543,0.747) | <0.001 | 0.665 (0.562,0.789) | <0.001 | 0.635(0.532,0.758) | <0.001 |
| Quartiles |  |  |  |  |  |  |
| Q1 (~36.55) | ref |  | ref |  | ref |  |
| Q2 (36.55~44.56) | 0.705 (0.571,0.87) | 0.001 | 0.656 (0.529,0.813) | <0.001 | 0.617(0.494,0.771) | <0.001 |
| Q3 (44.56~53.57) | 0.57 (0.455,0.713) | <0.001 | 0.597 (0.473,0.755) | <0.001 | 0.556(0.435,0.709) | <0.001 |
| Q4 (53.57~) | 0.744 (0.599,0.924) | 0.008 | 0.712 (0.565,0.898) | 0.004 | 0.652(0.512,0.831) | 0.001 |
| p for trend |  | 0.001 |  | 0.002 |  | 0.001 |

Notes:

Model a: No adjusted.

Model b: Adjusted for age, sex, BMI, TNM stage.

Model c: Adjusted for age, sex, BMI, TNM stage, tumor type, surgery, radiotherapy, chemotherapy, hypertension, diabetes, smoking, drinking, family history.
