# Supplementary material for: Serum Albumin-Creatinine Ratio Predicts Sarcopenia and Poor Outcomes in Patients with Colorectal Cancer
Source: Research Square preprint supplement (doi:10.21203/rs.3.rs-7897966/v1), 2025-12-30
Supplement: Supplementary file 5 [file ac72ee15b21881bf0d8dfaf2.docx]

**Table 3.** Association between ACR and recurrence of patients with colorectal cancer.

| IBI | Model a | p value | Model b | p value | Model c | p value |
| --- | --- | --- | --- | --- | --- | --- |
| Continuous (per SD) | 0.892 (0.796,0.999) | 0.047 | 0.862 (0.756,0.984) | 0.027 | 0.850 (0.740,0.980) | 0.023 |
| Cutoff value (High) | 0.66 (0.518,0.84) | <0.001 | 0.618 (0.467,0.82) | <0.001 | 0.588 (0.439,0.787) | <0.001 |
| Quartiles |  |  |  |  |  |  |
| Q1 (~2.59) | ref |  | ref |  | ref |  |
| Q2 (2.59~4.58) | 0.721 (0.524,0.993) | 0.045 | 0.616 (0.431,0.881) | 0.008 | 0.598 (0.415,0.862) | 0.006 |
| Q3 (4.58~8.81) | 0.641 (0.463,0.888) | 0.007 | 0.595 (0.411,0.861) | 0.006 | 0.566 (0.387,0.827) | 0.003 |
| Q4 (8.81~) | 0.688 (0.499,0.949) | 0.023 | 0.564 (0.387,0.824) | 0.003 | 0.547 (0.370,0.809) | 0.003 |
| p for trend |  | 0.034 |  | <0.001 |  | <0.001 |

Notes:

Model a: No adjusted.

Model b: Adjusted for gender, age, and BMI.

Model c: Adjusted for gender, age, BMI, hypertension, diabetes, T stage, N stage, tumor size, perineural invasion, vascular invasion, macroscopic type, differentiation, radiotherapy, chemotherapy.
